# Supplementary material for: Photoinduced Synthesis of Methylated Marine Cyclopeptide Galaxamide Analogs with Isoindolinone as Anticancer Agents
Source: MDPI journal article supplement (doi:10.3390/md20060379), 2022-06-05
Supplement: s1 [file s1]

## Supporting Information

# Photoinduced synthesis of methylated marine cyclopeptide Galaxamide analogs with isoindolinone as anticancer agents

Shimei Xiao, Zhiqiang Wang\*, Huanli Zhang, Lei Zhao, Qingran Chang, Xiong Zhang, Rui Yan, Xiaodan Wu, and Yingxue Jin\*

Key Laboratory for Photonic and Electronic Bandgap Materials, Ministry of Education, College of Chemistry & Chemical Engineering, Harbin Normal University, Harbin, 150025, China.

**\*Corresponding author.** E-mail: wangzq@hrbnu.edu.cn (Z.W.); yenghak@hrbnu.edu.cn (Y.J.)

### Contents

---

|                                                                                                                                 |         |
|---------------------------------------------------------------------------------------------------------------------------------|---------|
| 1. Table S1. The absolute configurations, relative free energies and populations of the conformations as determined in methanol | S2      |
| 2. The most stable conformers of the prepared compounds in methanol                                                             | S2      |
| 3. Computational details and the docking                                                                                        | S3-S4   |
| 4. <sup>1</sup> H, <sup>13</sup> C-NMR and HRMS of linear peptides.                                                             | S4-S16  |
| 5. <sup>1</sup> H, <sup>13</sup> C-NMR, HRMS and HPLC spectra of and cyclic peptides.                                           | S16-S32 |

---

1. **Table S1.** The absolute configurations, relative free energies and populations of the conformations as determined in methanol

| Compounds | Stable conformers* | $\Delta G^{**}$ | P%*** | Determined absolute configuration of C-3 |
|-----------|--------------------|-----------------|-------|------------------------------------------|
| 1         | 1S                 | 0               | 100   | <i>S</i>                                 |
| 2         | 2S-1               | 0               | 50.5  | <i>S</i>                                 |
|           | 3S-2               | 0.01            | 49.5  |                                          |
| 3         | 3S-1               | 0               | 98.7  | <i>S</i>                                 |
|           | 3S-2               | 2.55            | 1.3   |                                          |
| 4         | 4R-1               | 0               | 69.0  | <i>R</i>                                 |
|           | 4R-2               | 0.48            | 31.0  |                                          |
| 5         | 5R-1               | 0               | 99.8  | <i>R</i>                                 |
|           | 5R-2               | 3.61            | 0.2   |                                          |
| 6         | 6R-1               | 0.00            | 91.3  | <i>R</i>                                 |
|           | 6R-2               | 1.39            | 83.7  |                                          |
| 7         | 7R-1               | 0               | 70.0  | <i>R</i>                                 |
|           | 7R-2               | 0.59            | 25.7  |                                          |
|           | 7R-3               | 1.65            | 4.3   |                                          |
| 8         | 8R-1               | 0               | 8.03  | <i>R</i>                                 |
|           | 8R-2               | 0.83            | 19.7  |                                          |

\*See Fig.S1 for the structures of the most stable conformers.

\*\*The unit for  $\Delta G$  is kcal mol<sup>-1</sup>.

\*\*\*Populations are based on  $\Delta G$  values.

2. The most stable conformers of the prepared compounds in methanol

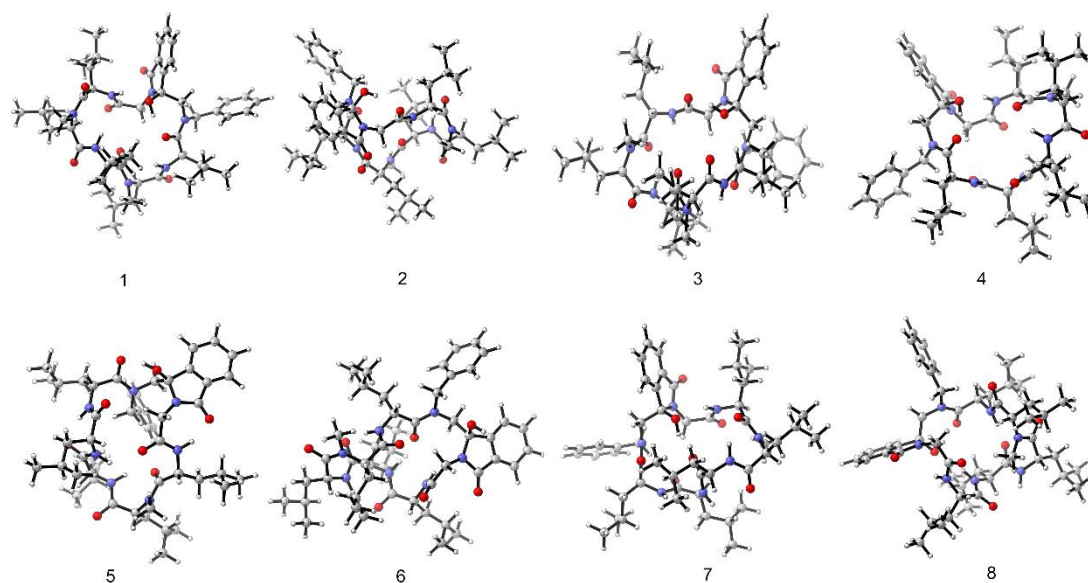

**Fig. S1.** The most stable low energy conformers of cyclic compounds in methanol (DFT/B3LYP/6-31G\*\*).

### 3. Computational details

Conformational analysis was performed by fixing the absolute configuration of C-3 with the MMFF94 method. The obtained conformers were optimized at the DFT/B3LYP/6-31G(d,p) level by Gaussian 09 (Gaussian 09, Revision C.01; Gaussian, Inc.: Wallingford, CT, 2010.). The excitation energy (denoted by wavelength in nm) and rotatory strength *R* of the lowest energy conformations (>5% population) were calculated at the level of TDDFT/ $\omega$ B97XD/cc-PVDZ using polarizable continuum model (PCM) to consider the solvent effect. ECD curves were obtained based on rotatory strengths using half bandwidth of 0.30~0.40 eV by Specdis 1.71(T. Bruhn, et. al. *Chirality*, 2013, **25**, 243). UV correction was used to facilitate comparison between the calculated and experimental data.

Docking experiments were performed by AutoDock 4.26 (ADT). The structure of target protein MDM2 was downloaded from the RCSB protein database (RCSB PDB, <http://www.pdb.org/>), and the modified ligand and water were separated using PyMol software. The cyclic structure was based on the optimized structure at the level of DFT/B3LYP/6-31G(d,p). The hydrogen was added and charge calculated by AutoDock Tools 1.5.6 software, and the docking results were processed by Discovery Studio 2019 Client. The docking parameters were shown in supplements Table S1 and S2.

**Table S2.** Docking process parameter settings for those with relative high binding energy.

| Parameter       | 4R           | 8R           |
|-----------------|--------------|--------------|
| Grid box (nm)   | 60 × 60 × 60 | 60 × 60 × 60 |
| spacing         | 0.375        | 0.375        |
| grid center x   | -7.442       | -7.442       |
| grid center y   | 0.621        | 0.621        |
| grid center z   | 6.892        | 6.892        |
| GA runs         | 20           | 20           |
| population size | 150          | 150          |

**Table S3.** The forces between compound **4**, compound **8** and MDM2 protein obtained by molecular docking.

| Compounds | Vander Waals                                                                                                                                                         | Conventional<br>H-bond | Carbon H-<br>bond | Alkyl,<br>$\pi$ -Alkyl                                                                                                                       | $\pi$ -<br>Sigma,                        | Amide-Pi<br>Stacked |
|-----------|----------------------------------------------------------------------------------------------------------------------------------------------------------------------|------------------------|-------------------|----------------------------------------------------------------------------------------------------------------------------------------------|------------------------------------------|---------------------|
| <b>4</b>  | Leu <sup>54</sup> , Leu <sup>57</sup> ,<br>Gly <sup>58</sup> , Gln <sup>72</sup> , His <sup>73</sup> ,<br>Val <sup>75</sup> , Phe <sup>86</sup> , Ile <sup>103</sup> |                        | Gly <sup>58</sup> | Phe <sup>55</sup> , Ile <sup>61</sup> , Met <sup>62</sup> , Val <sup>93</sup> ,<br>Ile <sup>99</sup>                                         | Tyr <sup>67</sup> ,<br>His <sup>96</sup> |                     |
| <b>8</b>  | Lys <sup>51</sup> , Phe <sup>55</sup> , Gly <sup>58</sup> , Gln <sup>72</sup> ,<br>Phe <sup>91</sup> , Tyr <sup>100</sup> , Ile <sup>103</sup>                       | His <sup>96</sup>      | His <sup>73</sup> | Leu <sup>57</sup> , Val <sup>57</sup> , Ile <sup>61</sup> , Met <sup>62</sup> ,<br>Tyr <sup>67</sup> , Val <sup>93</sup> , Ile <sup>99</sup> | Val <sup>93</sup>                        | Leu <sup>54</sup>   |

#### 4. <sup>1</sup>H, <sup>13</sup>C-NMR and HRMS of linear peptides.

##### (1) <sup>1</sup>H, <sup>13</sup>C-NMR and HRMS of **9**.

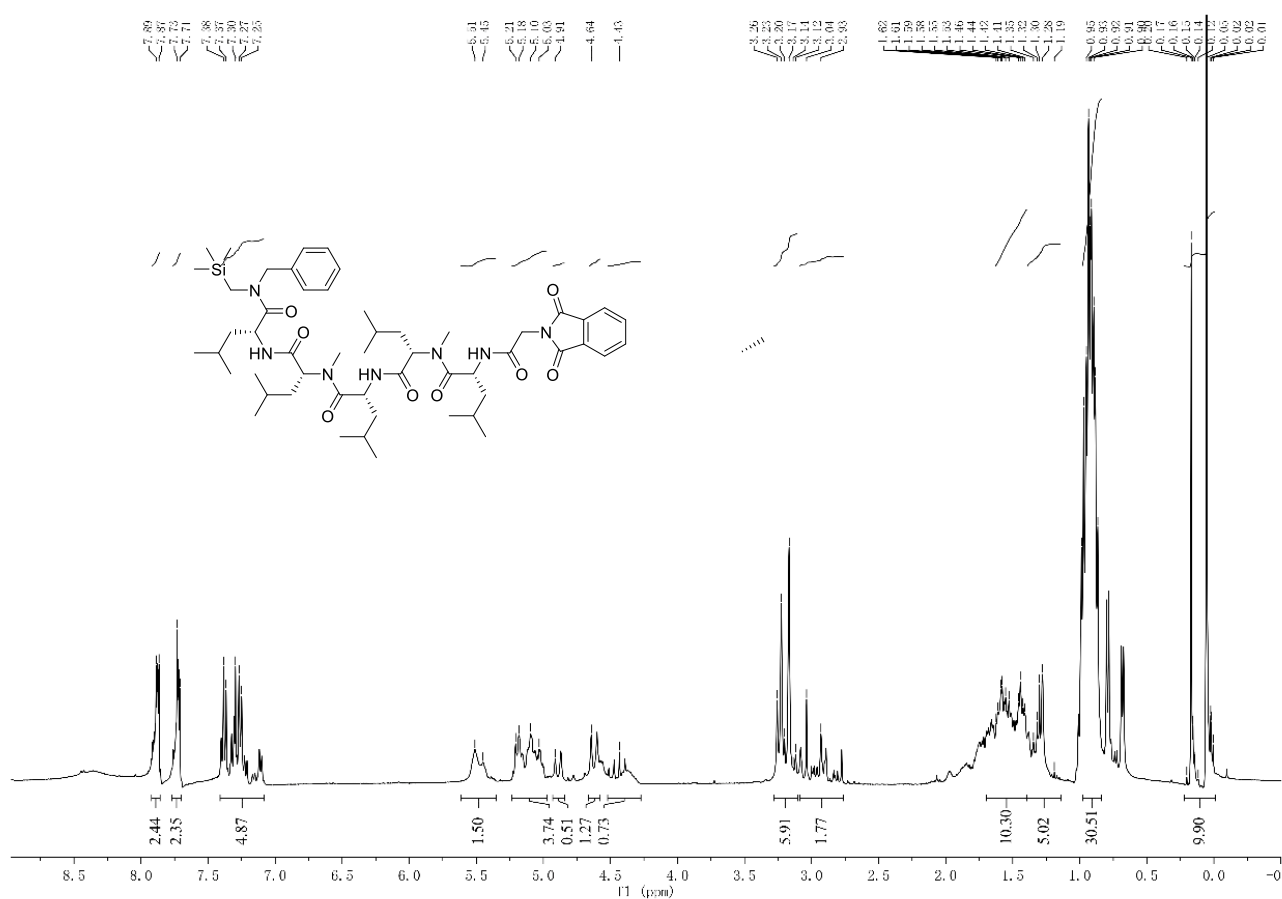

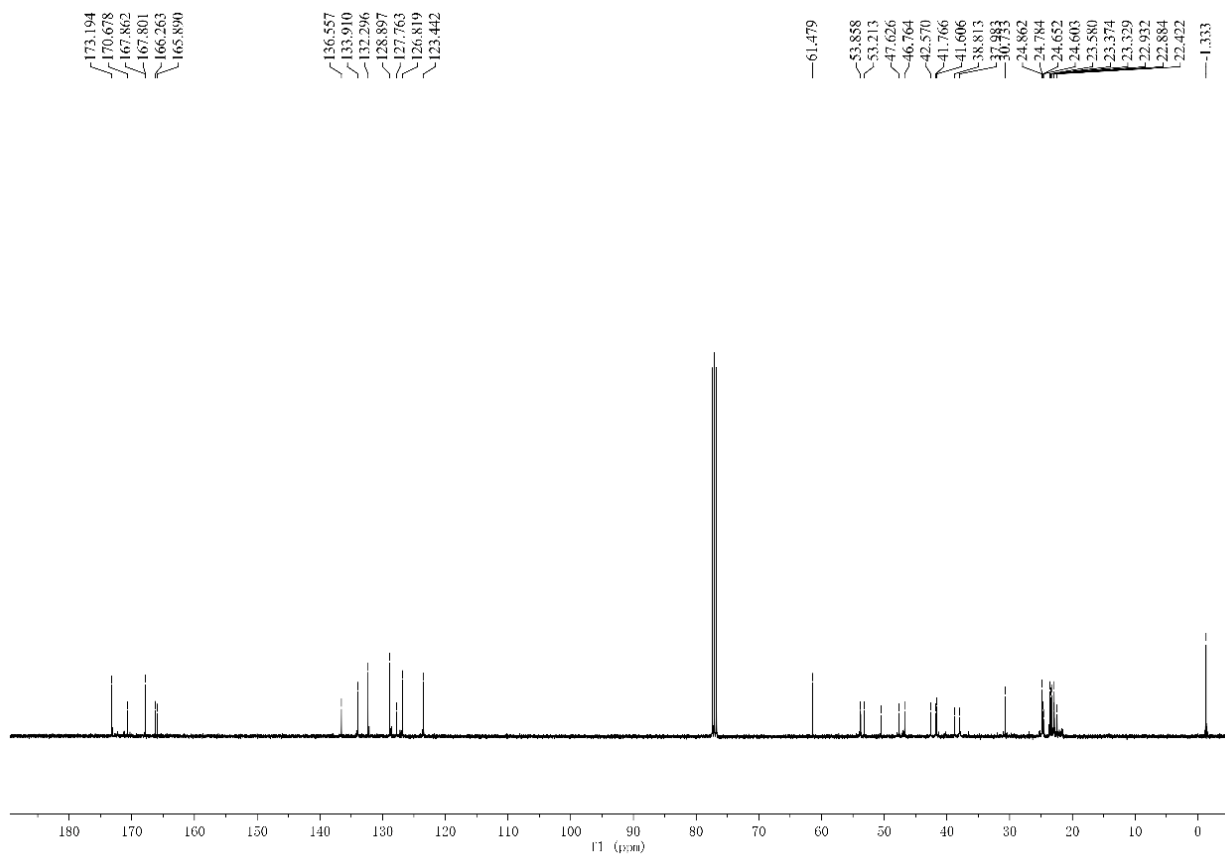

1-61 #18 RT: 0.10 AV: 1 NL: 1.77E8  
T: FTMS + p ESI Full lock ms [80.0000-1200.0000]

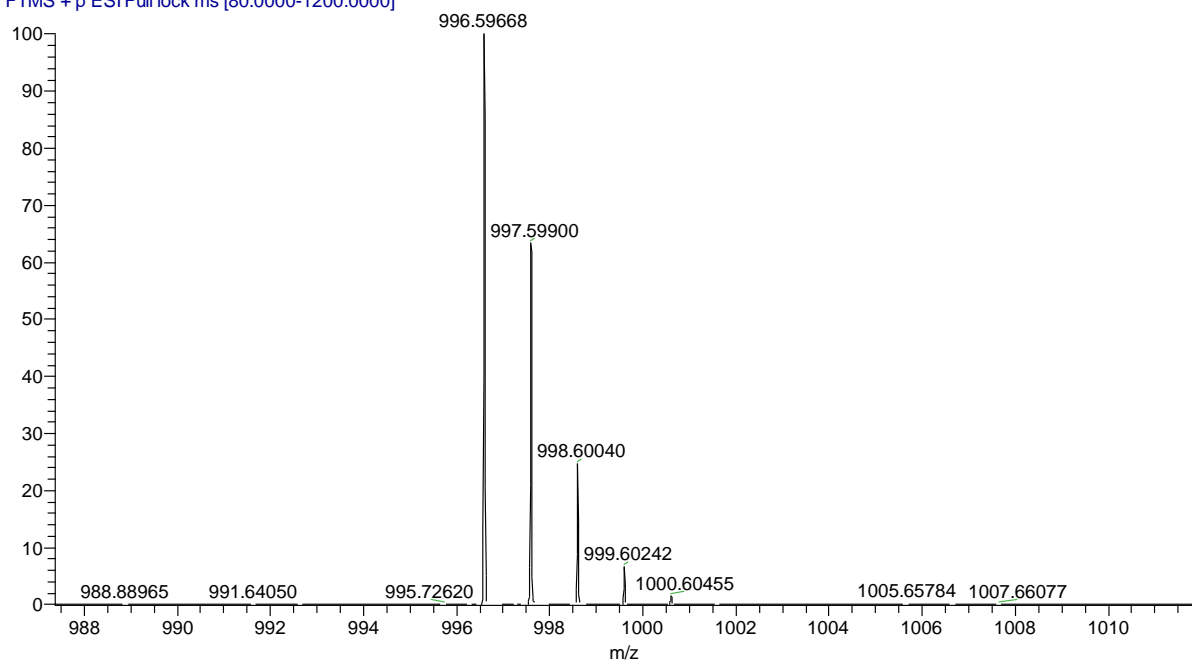

(2)  $^1\text{H}$ ,  $^{13}\text{C}$ -NMR and HRMS of **10**.

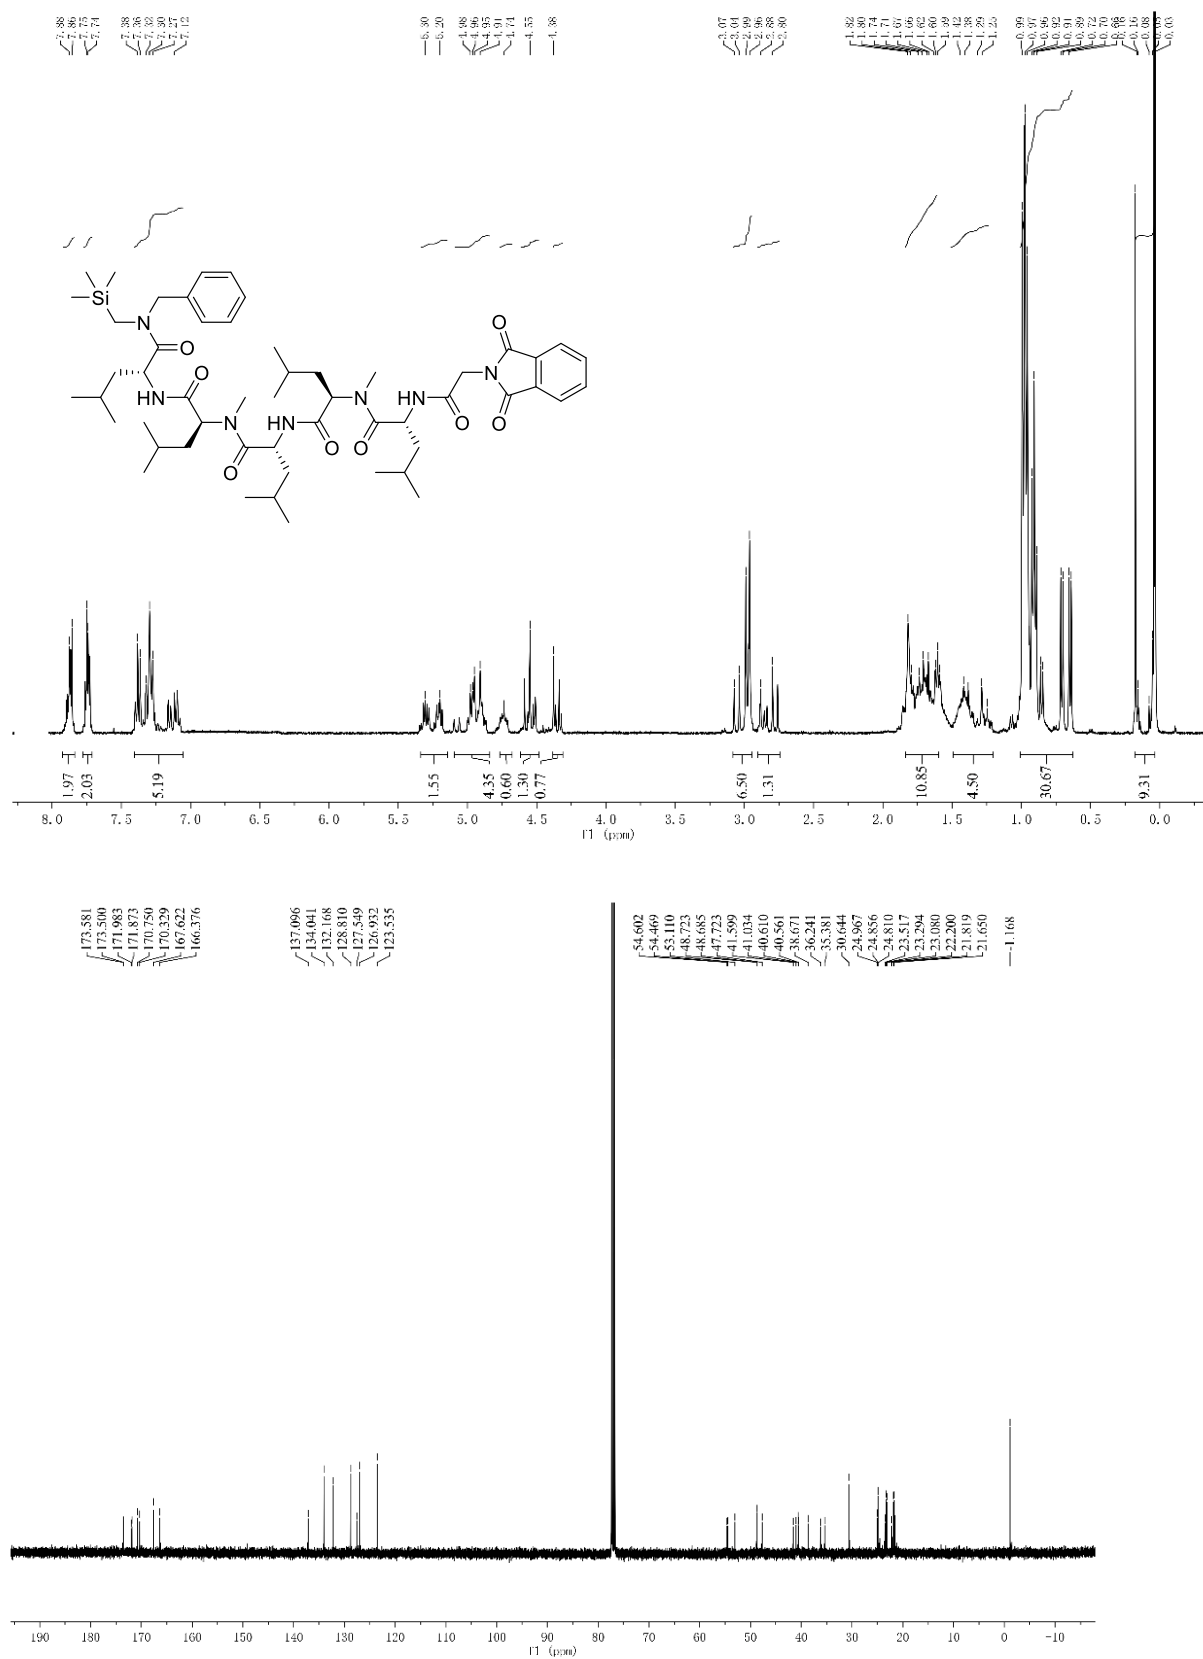

6-18 #18 RT: 0.13 AV: 1 NL: 6.59E7  
T: FTMS + p ESI Full lock ms [150.0000-2250.00]

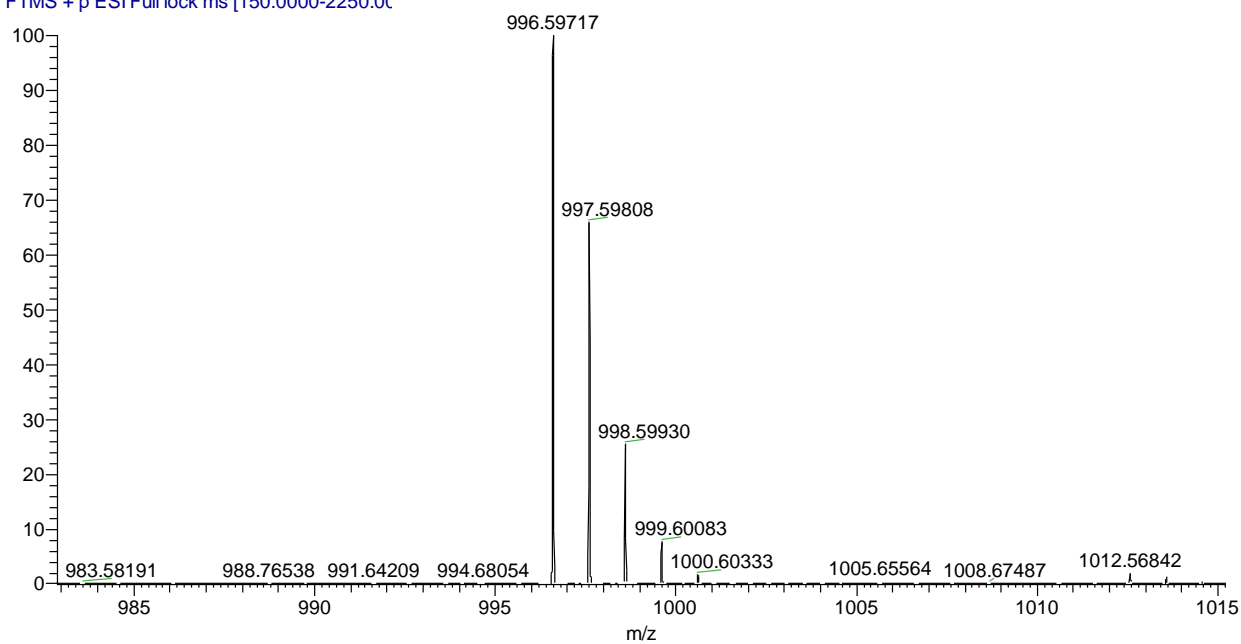

(3)  $^1\text{H}$ ,  $^{13}\text{C}$ -NMR and HRMS of **11**.

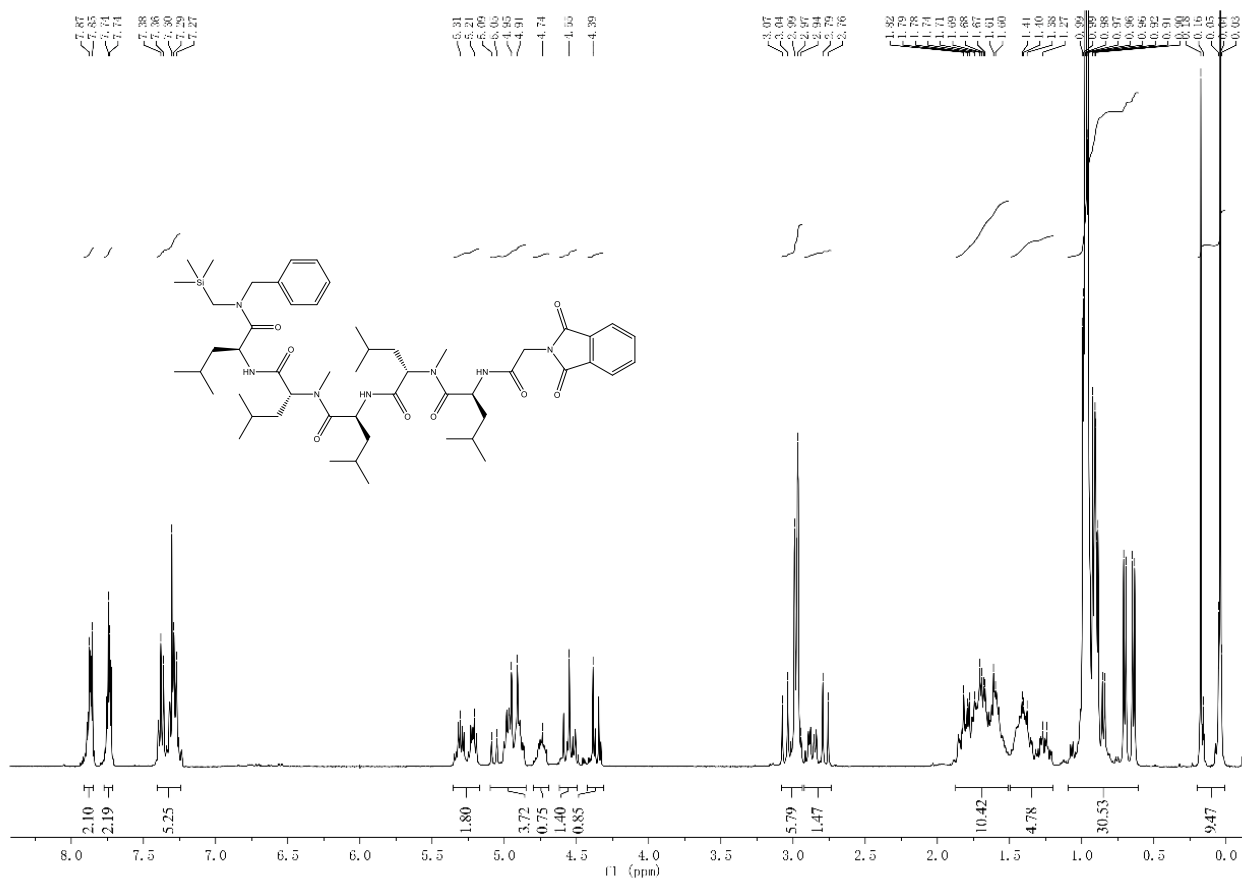

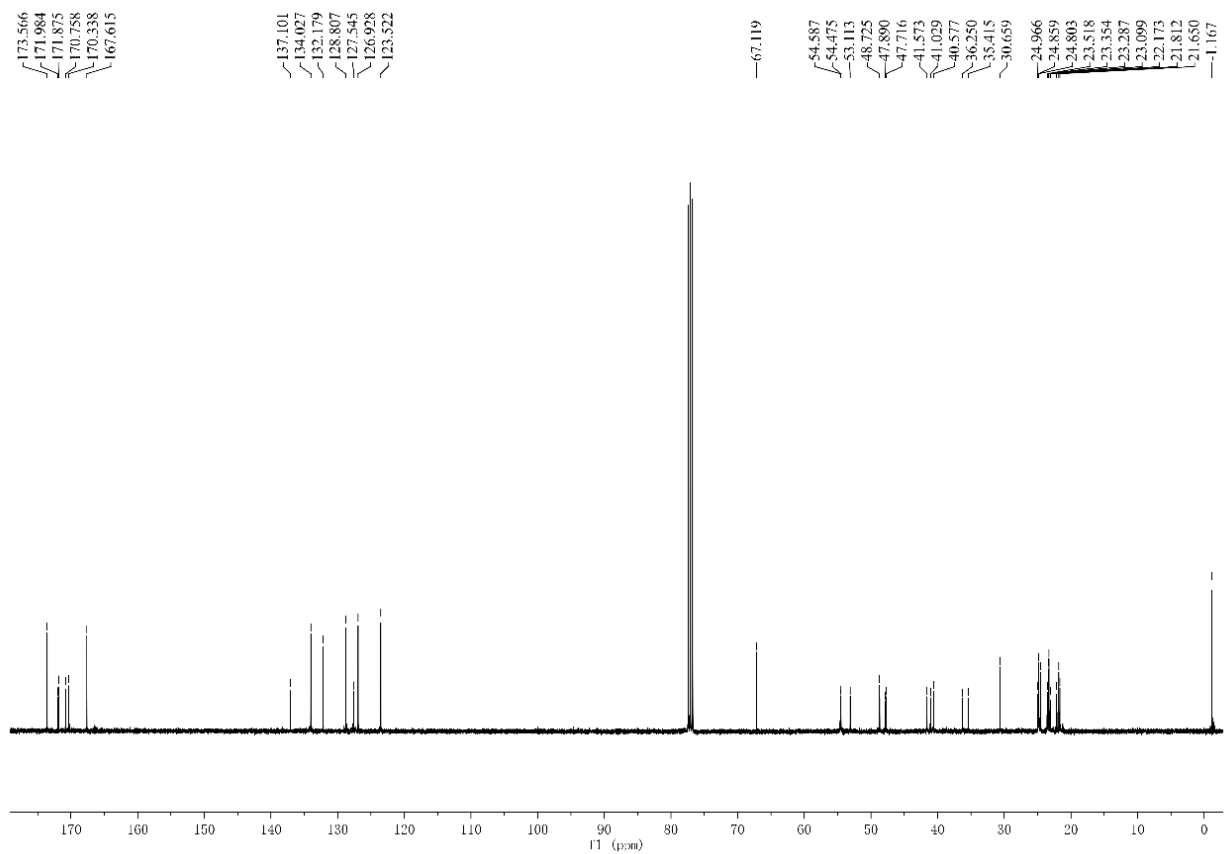

6-19 #17 RT: 0.12 AV: 1 NL: 3.46E7  
T: FTMS + p ESI Full lock ms [150.0000-2250.00]

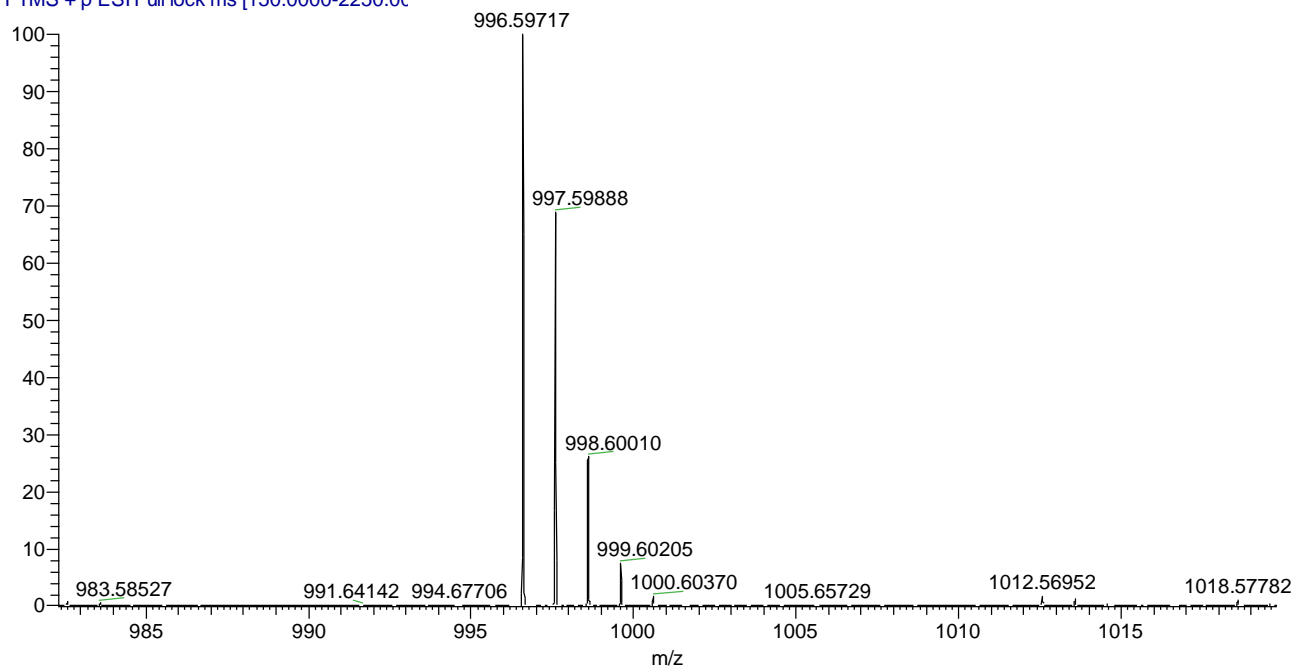



(4)  $^1\text{H}$ ,  $^{13}\text{C}$ -NMR and HRMS of **12**.

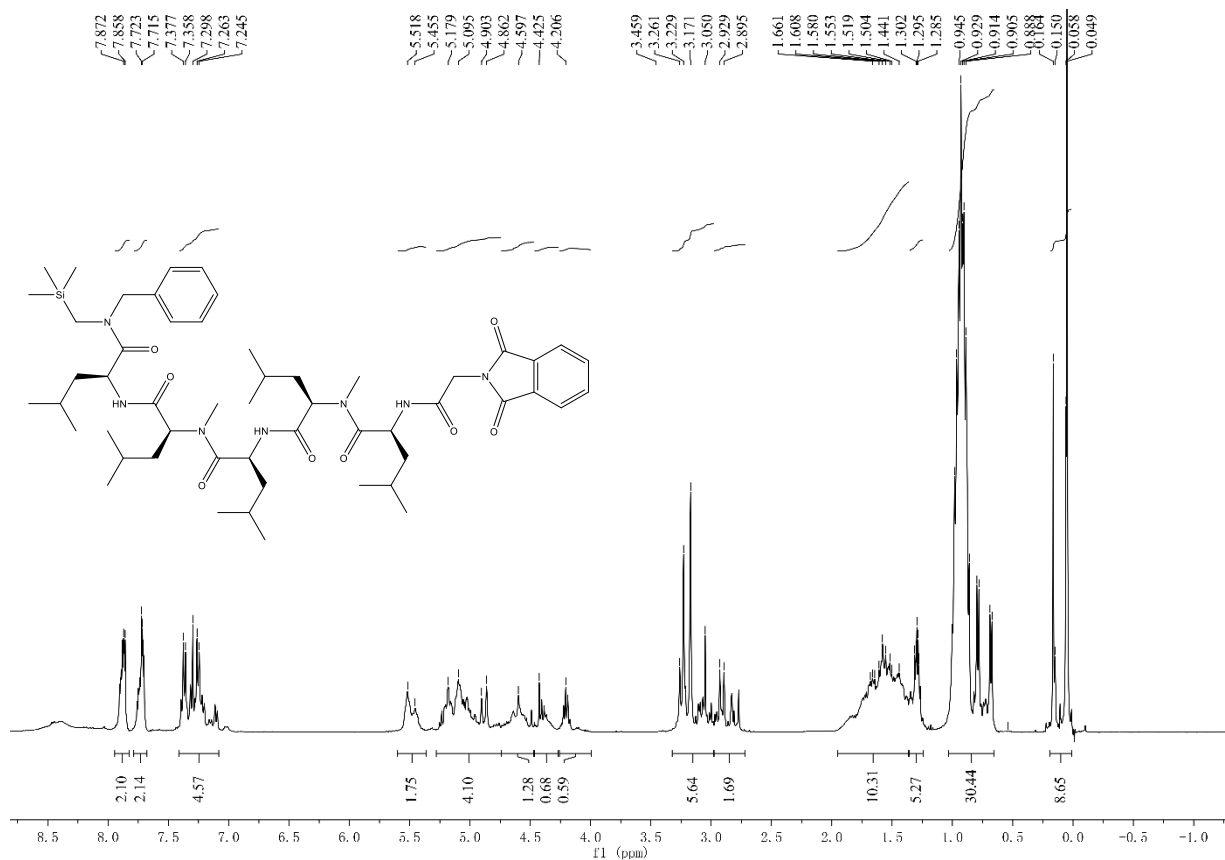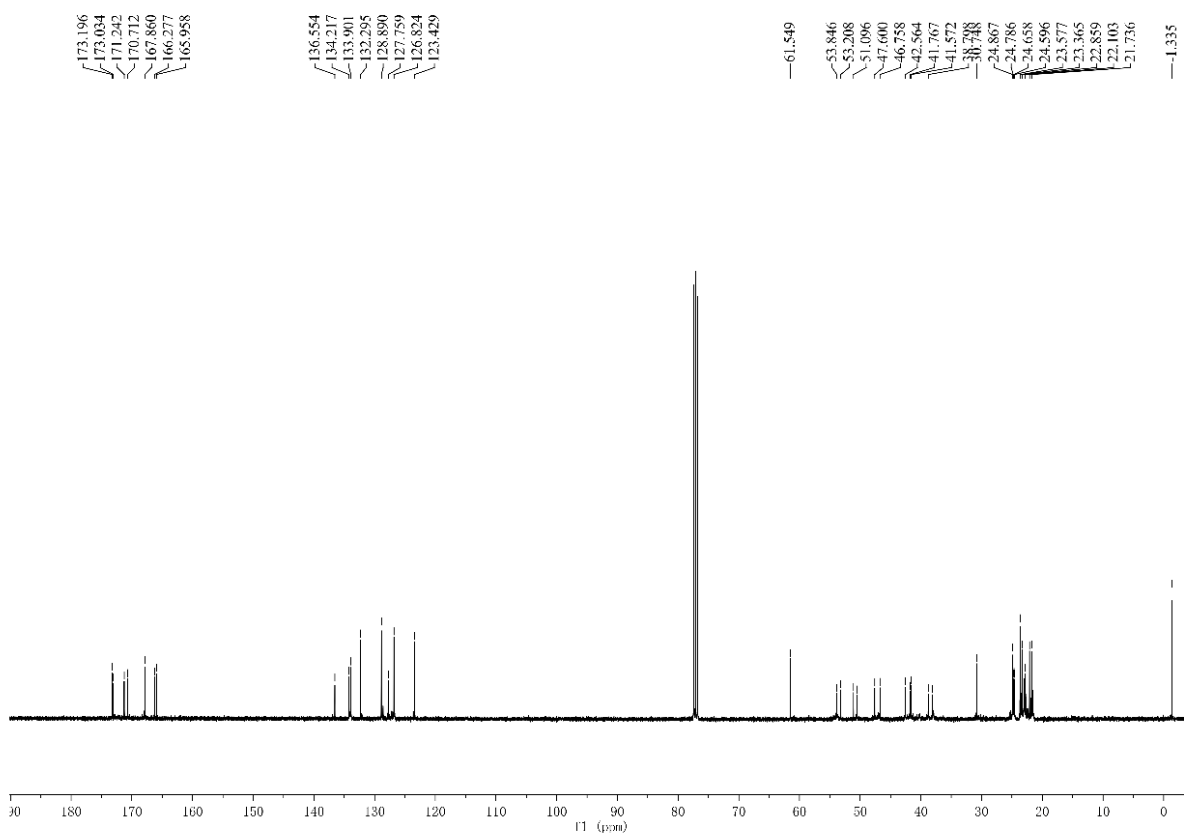

6-18 #18 RT: 0.13 AV: 1 NL: 6.59E7  
T: FTMS + p ESI Full lock ms [150.0000-2250.00]

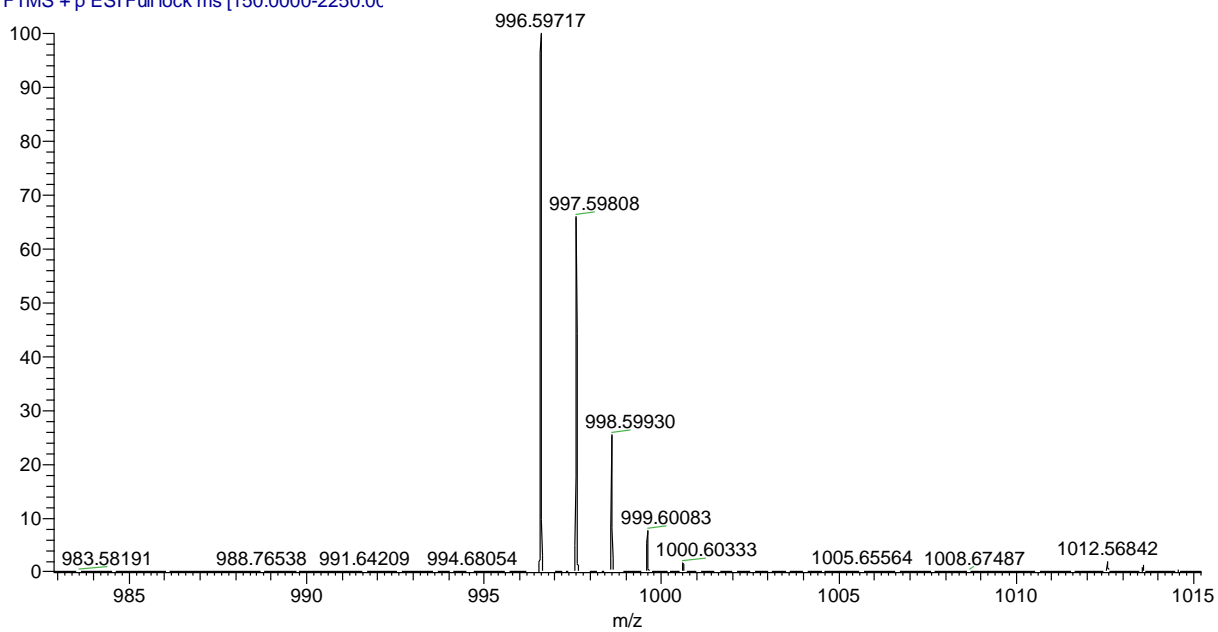

(5)  $^1\text{H}$ ,  $^{13}\text{C}$ -NMR and HRMS of **13**.

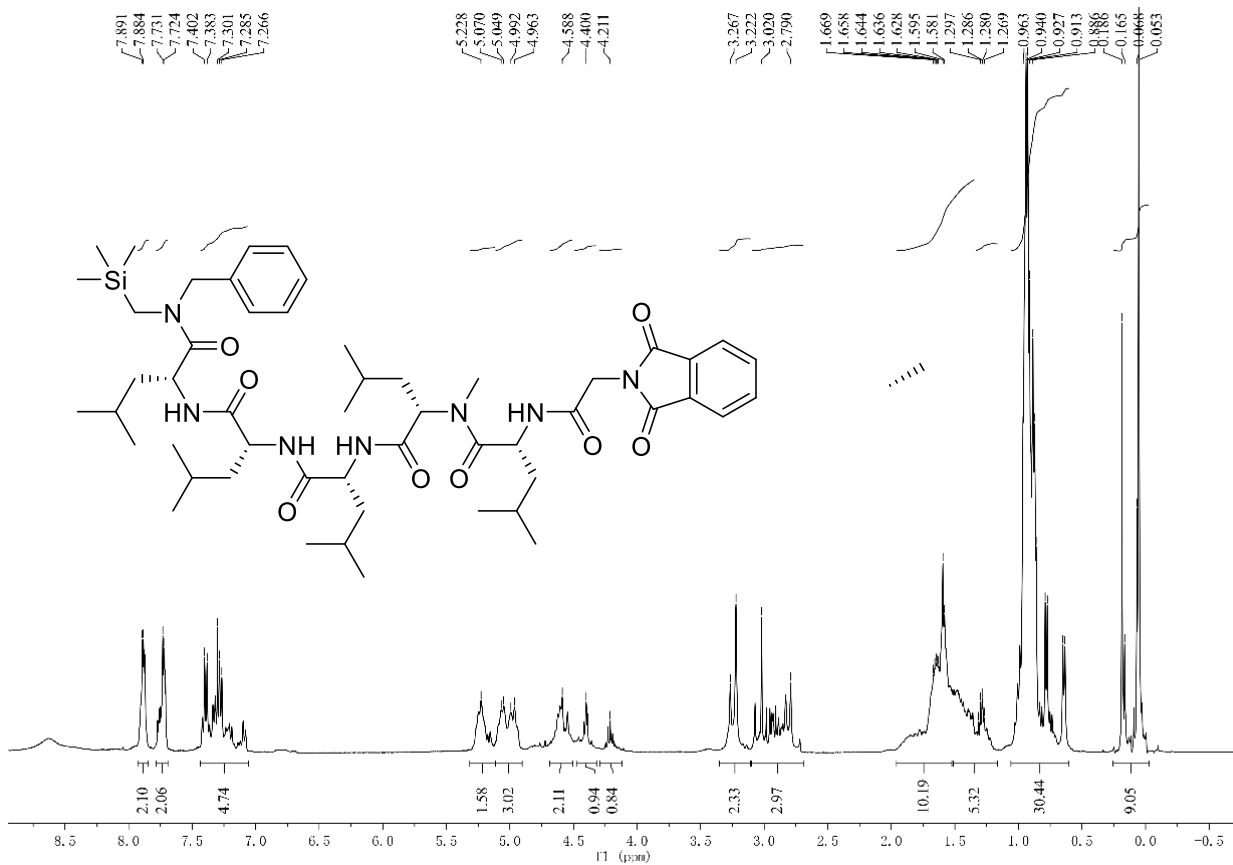

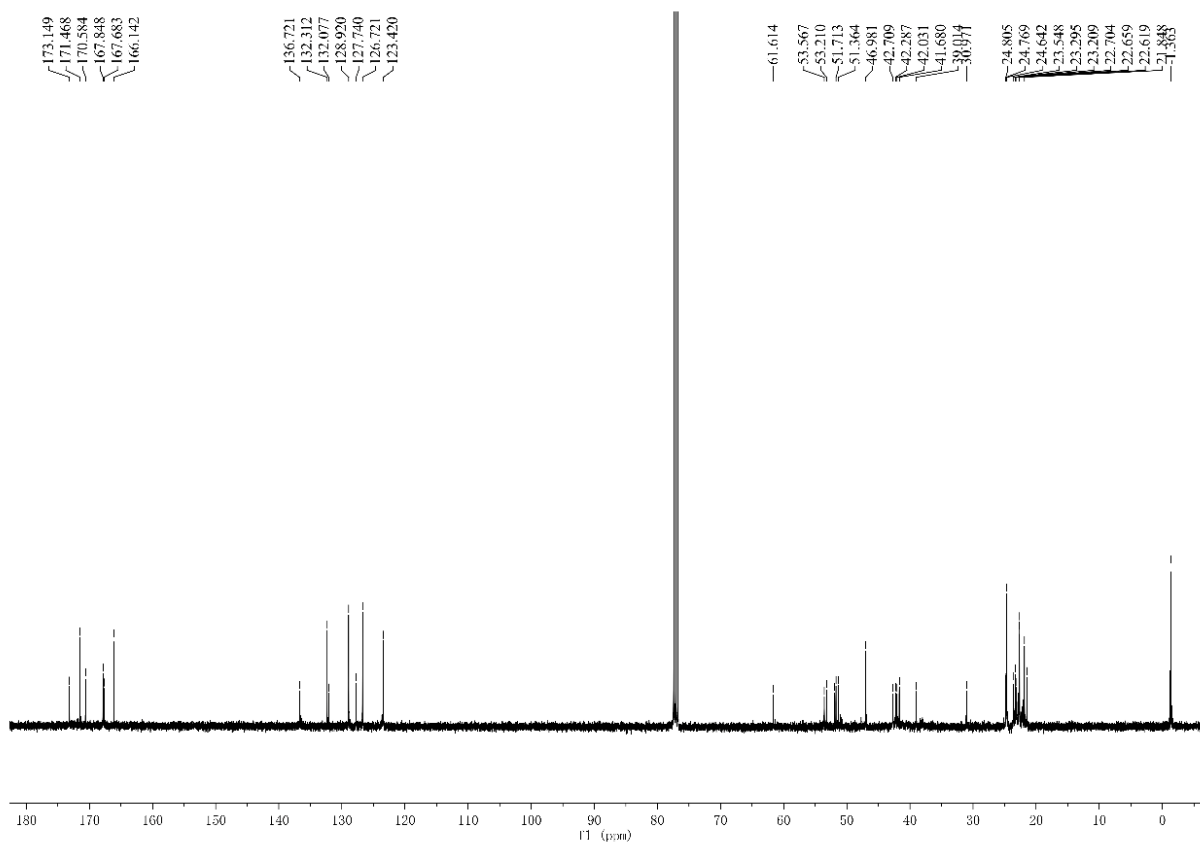

6-20 #18 RT: 0.13 AV: 1 NL: 3.82E7  
T: FTMS + p ESI Full lock ms [150.0000-2250.00]

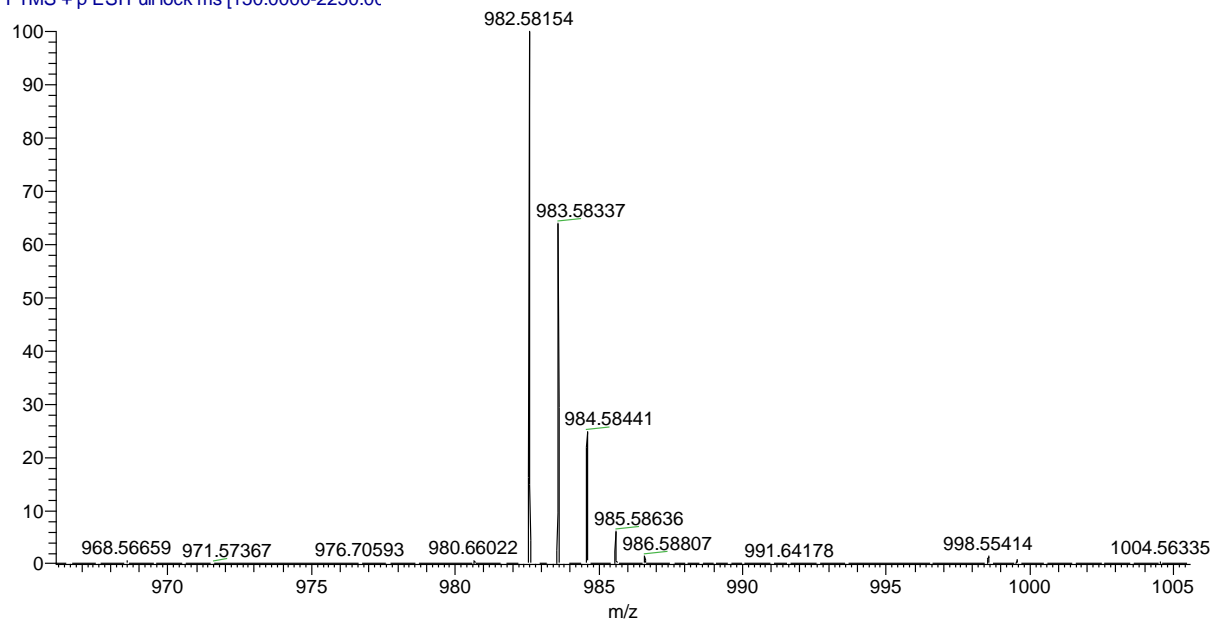

(6)  $^1\text{H}$ ,  $^{13}\text{C}$ -NMR and HRMS of **14**.

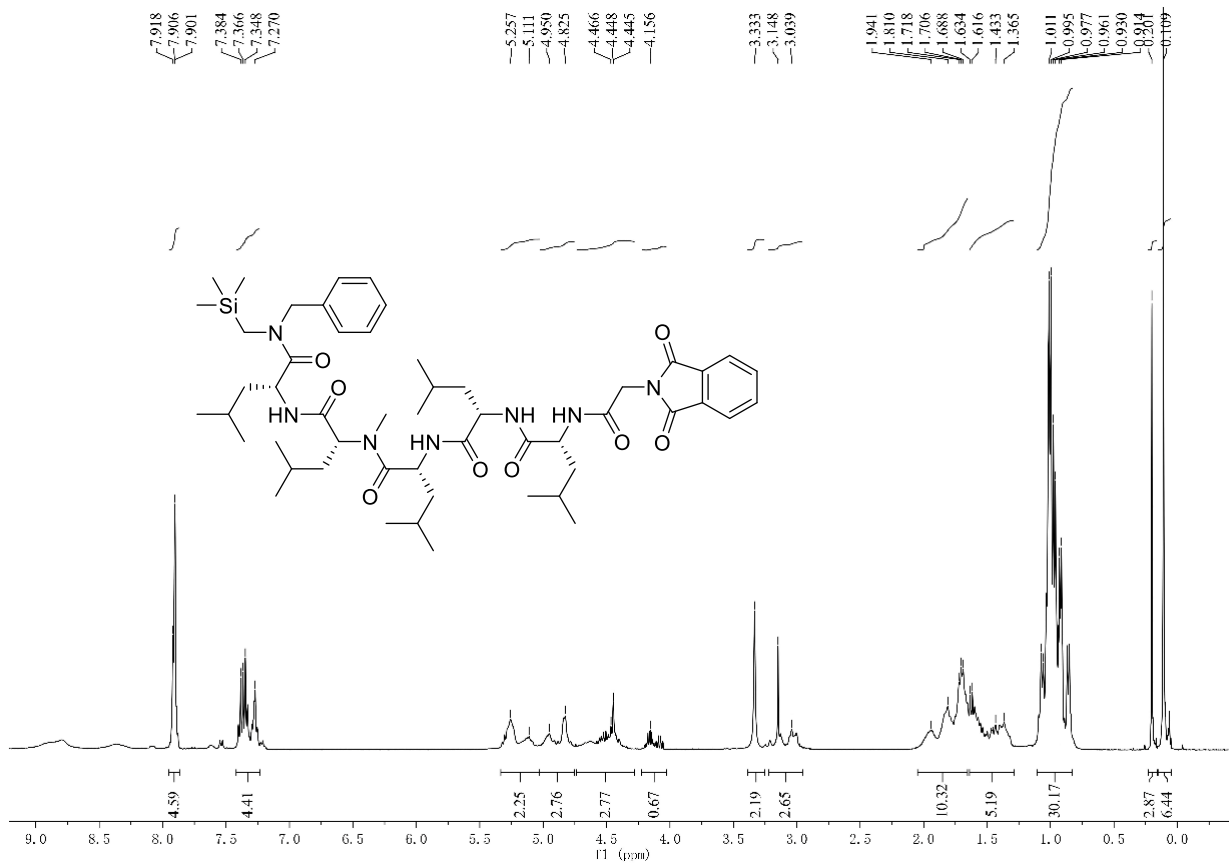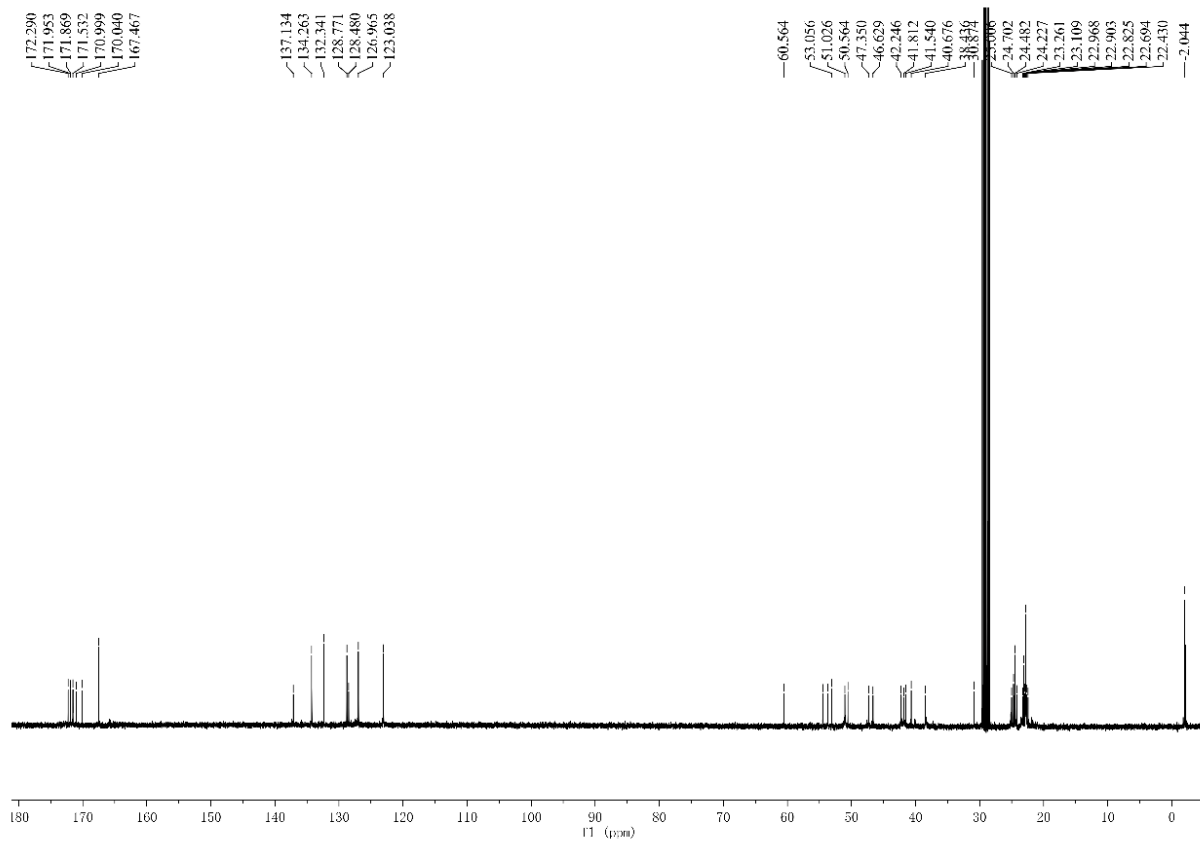

6-21 #40 RT: 0.29 AV: 1 NL: 9.81E5  
T: FTMS + p ESI Full lock ms [150.0000-2250.00]

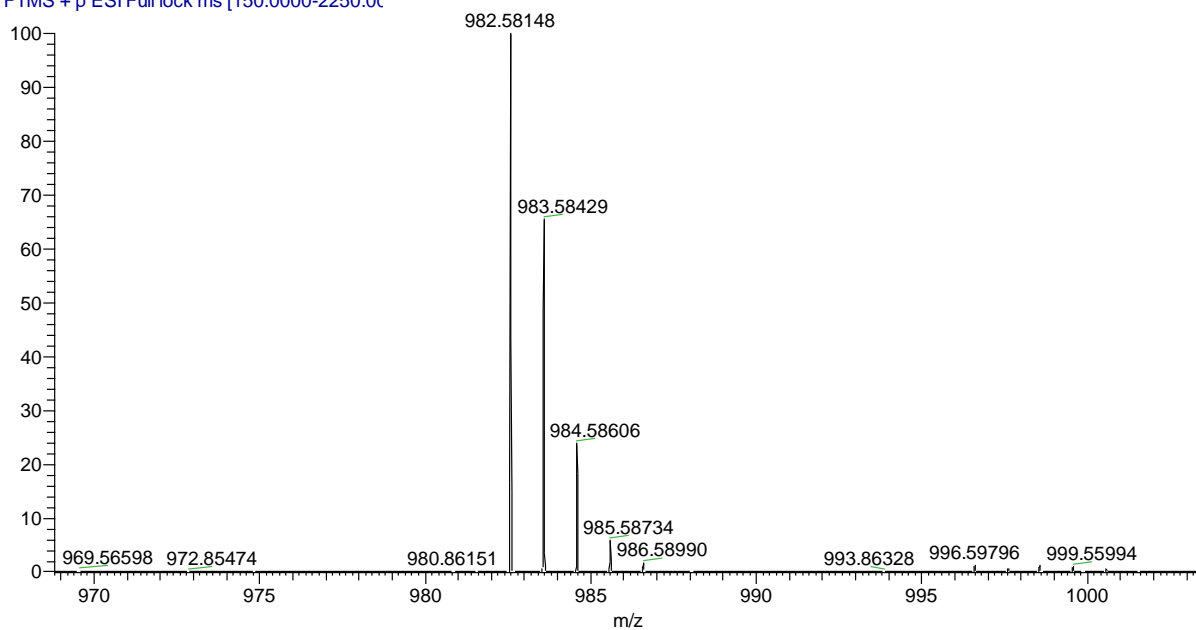

(7)  $^1\text{H}$ ,  $^{13}\text{C}$ -NMR and HRMS of **15**.

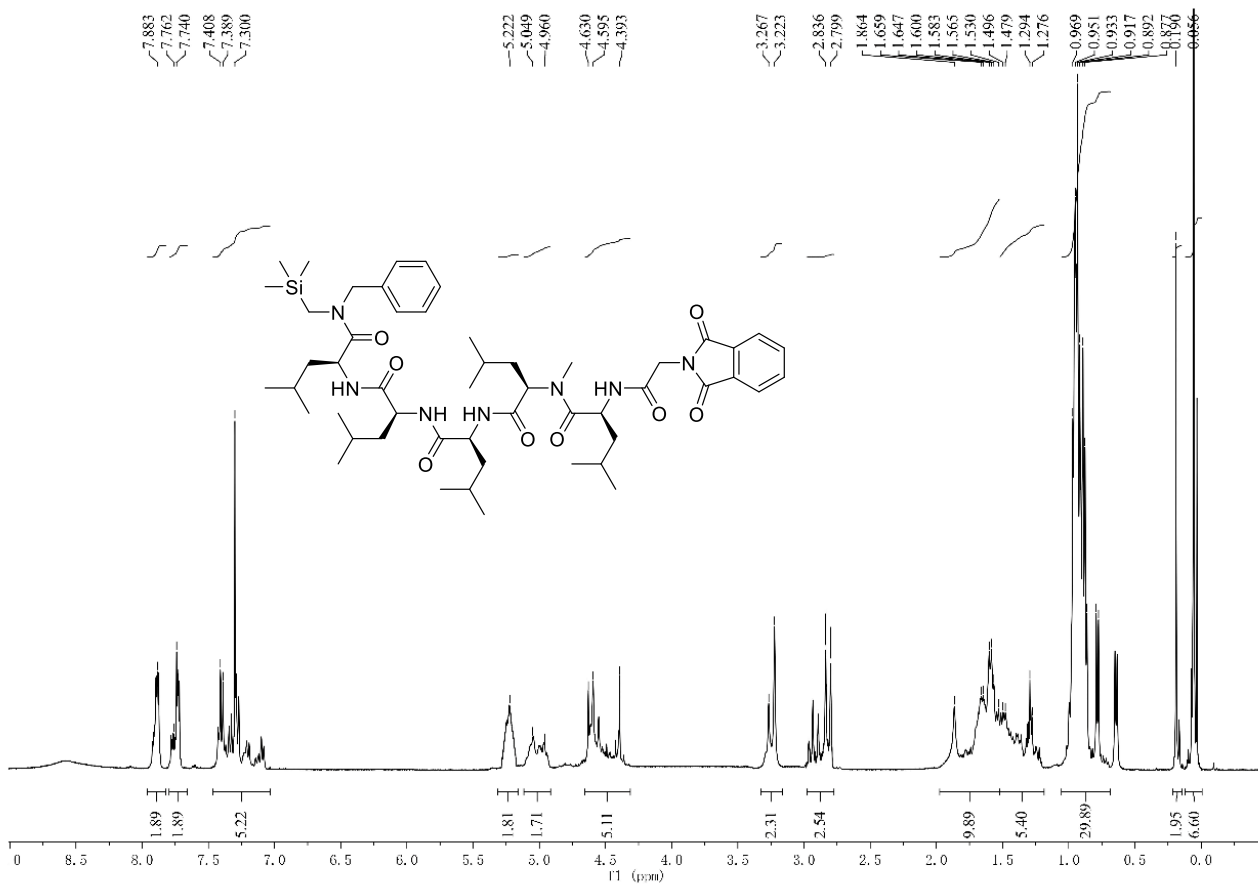

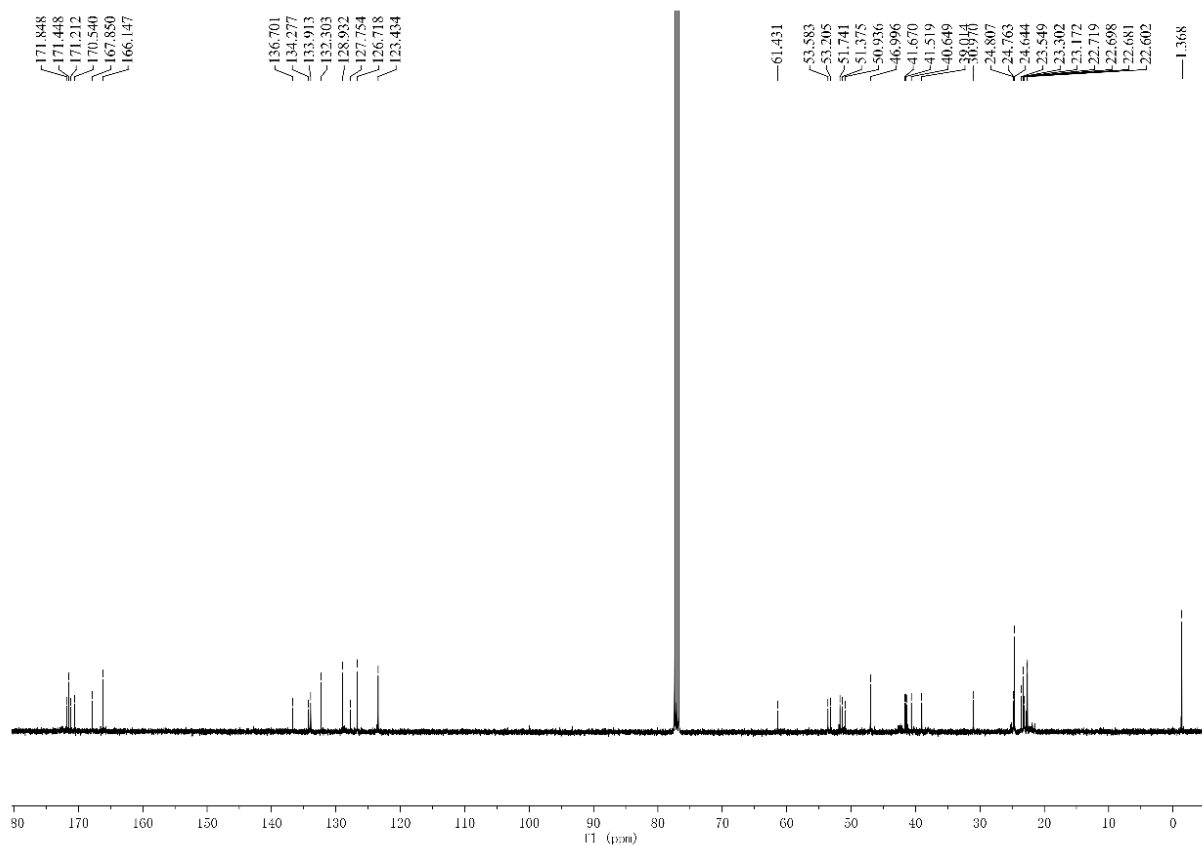

6-22 #18 RT: 0.13 AV: 1 NL: 3.39E7  
T: FTMS + p ESI Full lock ms [150.0000-2250.00]

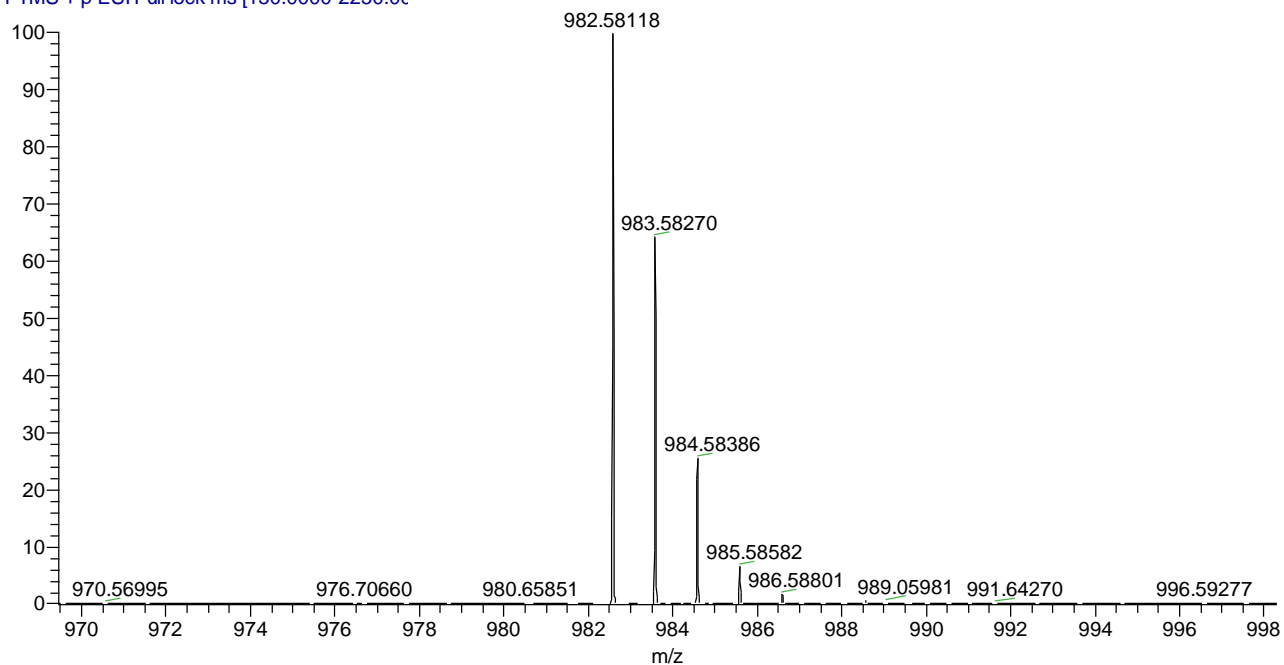

(8)  $^1\text{H}$ ,  $^{13}\text{C}$ -NMR and HRMS of **16**.

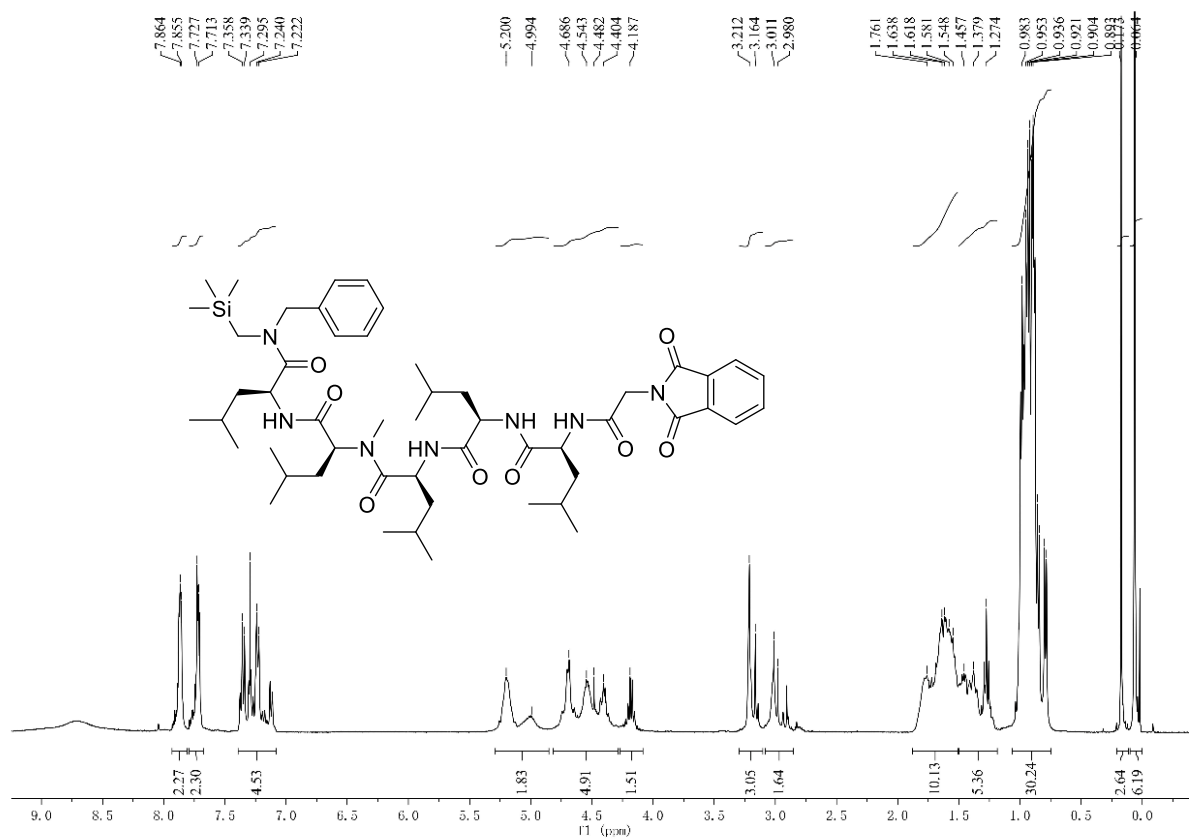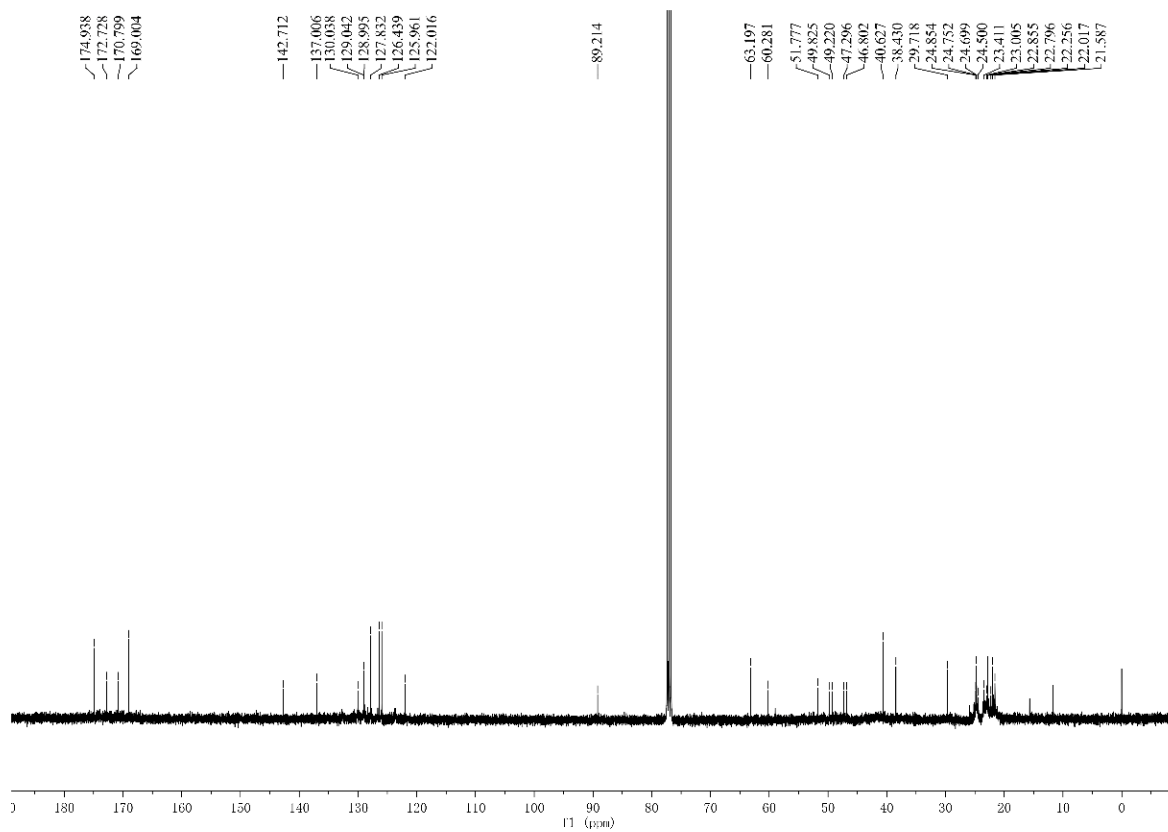

6-24 #12 RT: 0.09 AV: 1 NL: 5.51E7  
T: FTMS + p ESI Full lock ms [150.0000-2250.00]

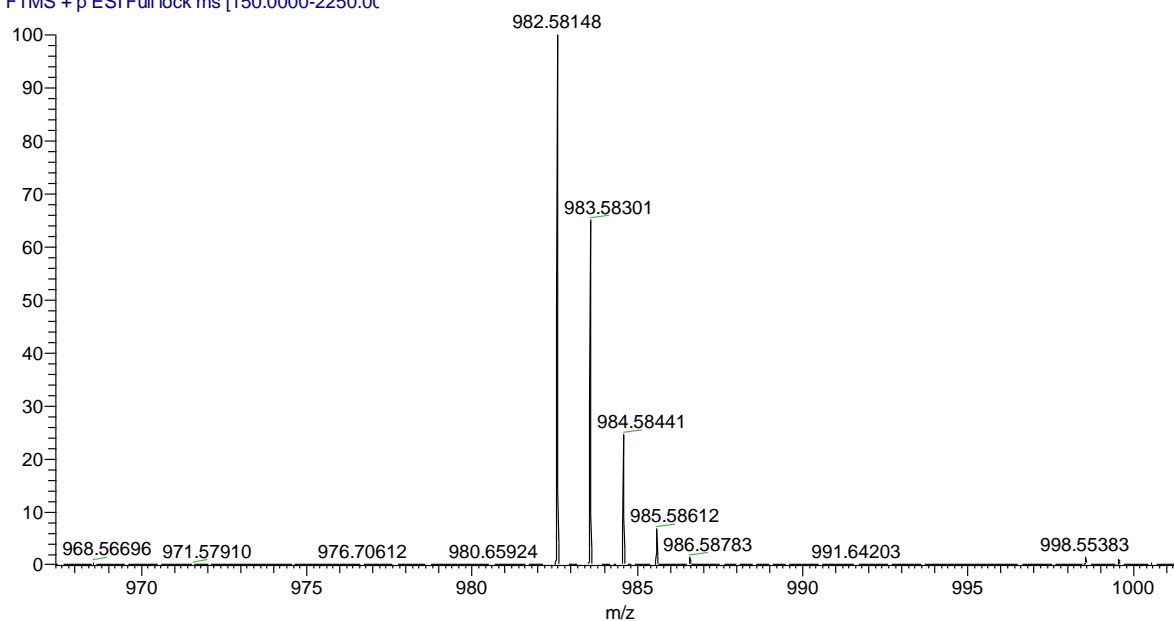

5.  $^1\text{H}$ ,  $^{13}\text{C}$ -NMR, HRMS and HPLC of cyclic peptides.

(1)  $^1\text{H}$ ,  $^{13}\text{C}$ -NMR, HRMS and HPLC of **1**.

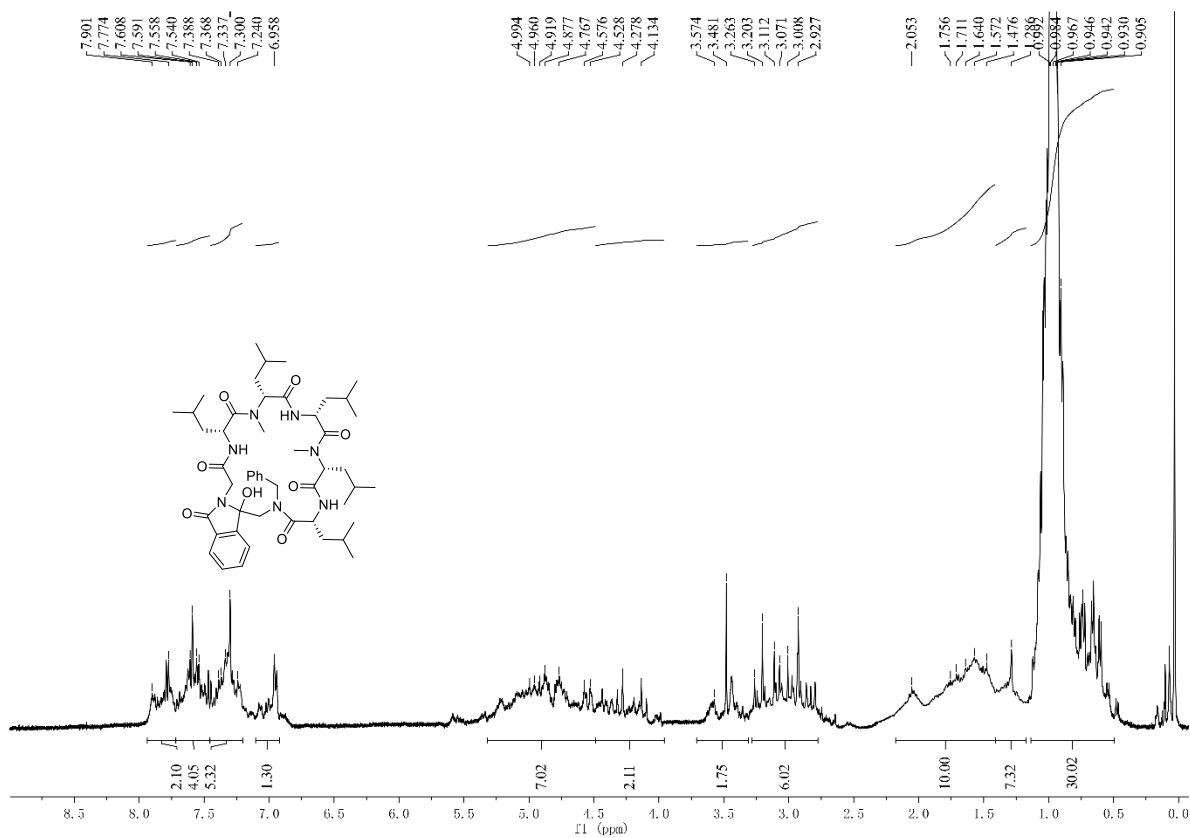



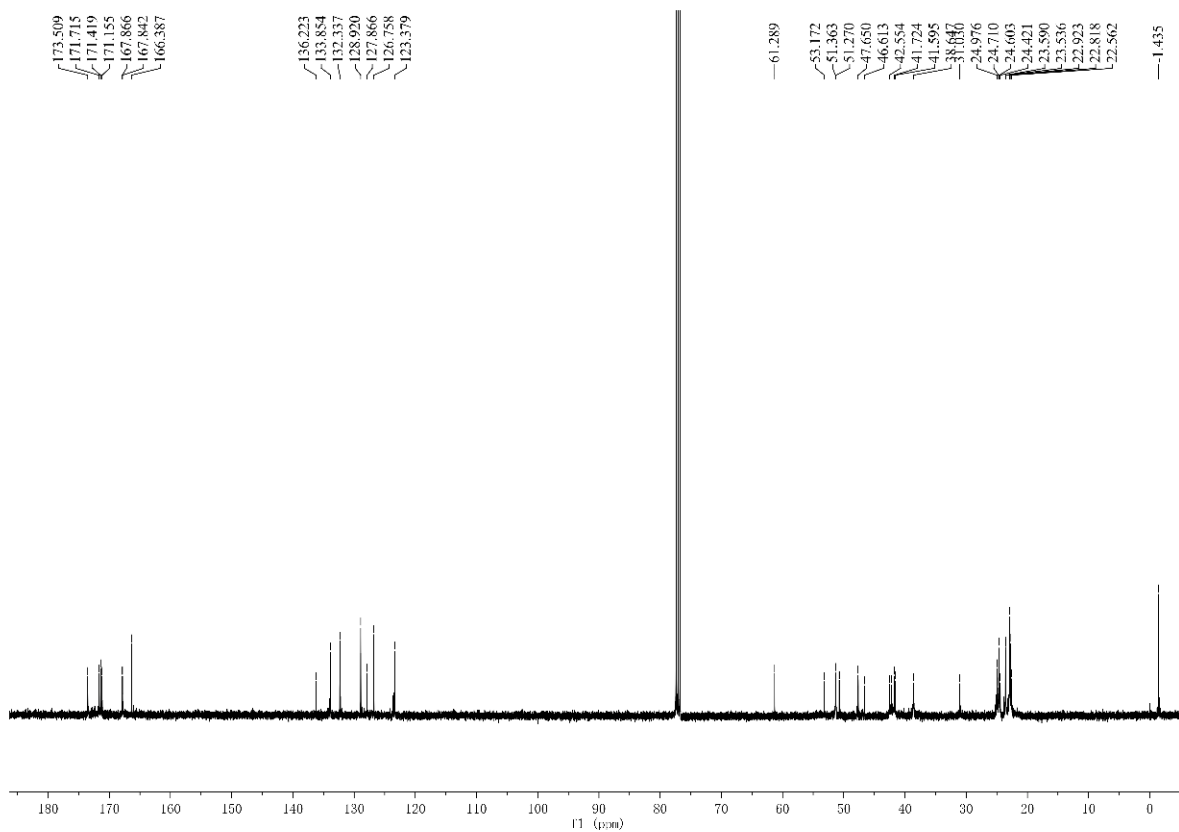

6-25 #15 RT: 0.11 AV: 1 NL: 2.05E7  
T: FTMS + p ESI Full lock ms [150.0000-2250.00]

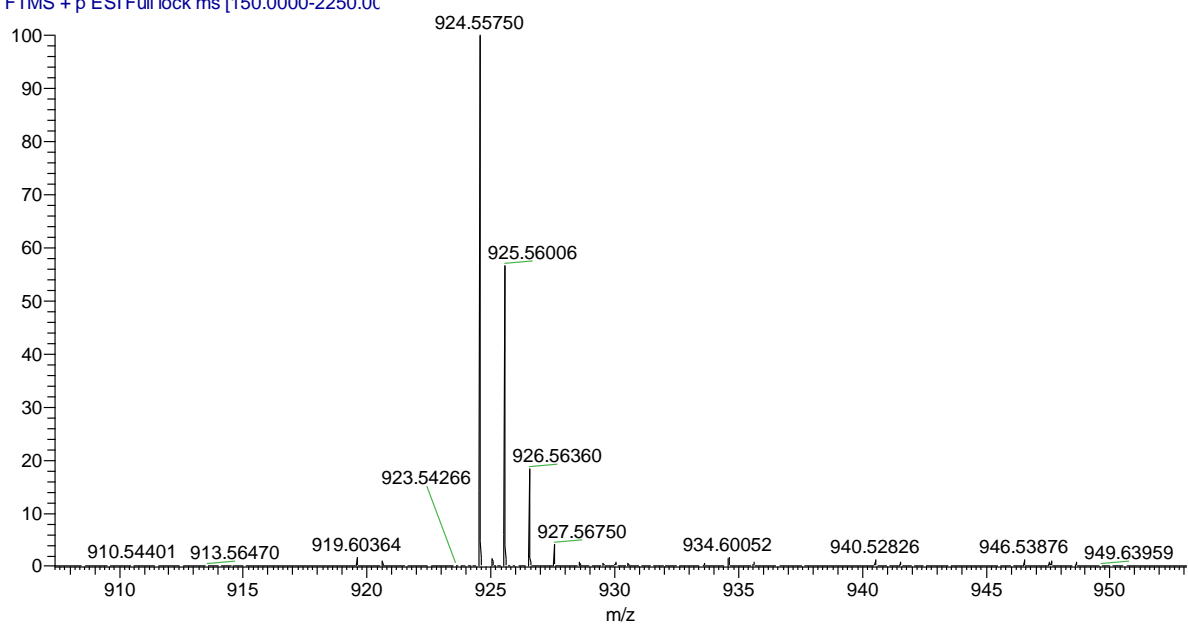

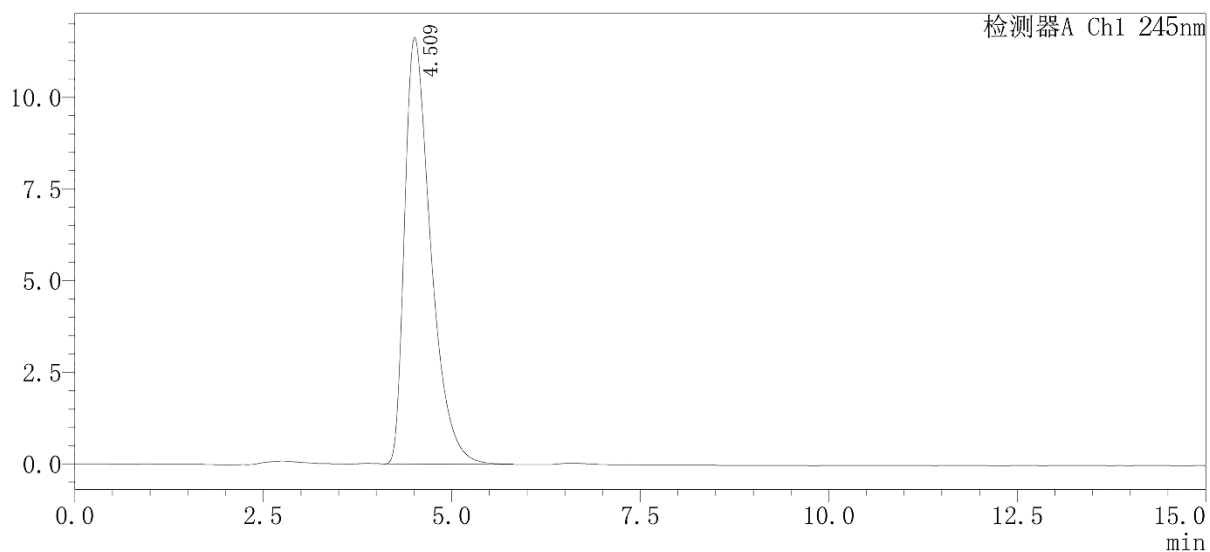

HPLC conditions: Shiseido Capcell PAK C18 (150×4.0 mm, 5 μm) was used as the column at 30 °C, and the mobile phase flow rate was 1 mL/min. During the analytical run, the elution was carried out using mobile phases A (Ultrapure water) and B (acetonitrile), the percentage of mobile phases B was 30%, while the detection wavelength was 245 nm.

(2)  $^1\text{H}$ ,  $^{13}\text{C}$ -NMR, HRMS and HPLC of **2**.

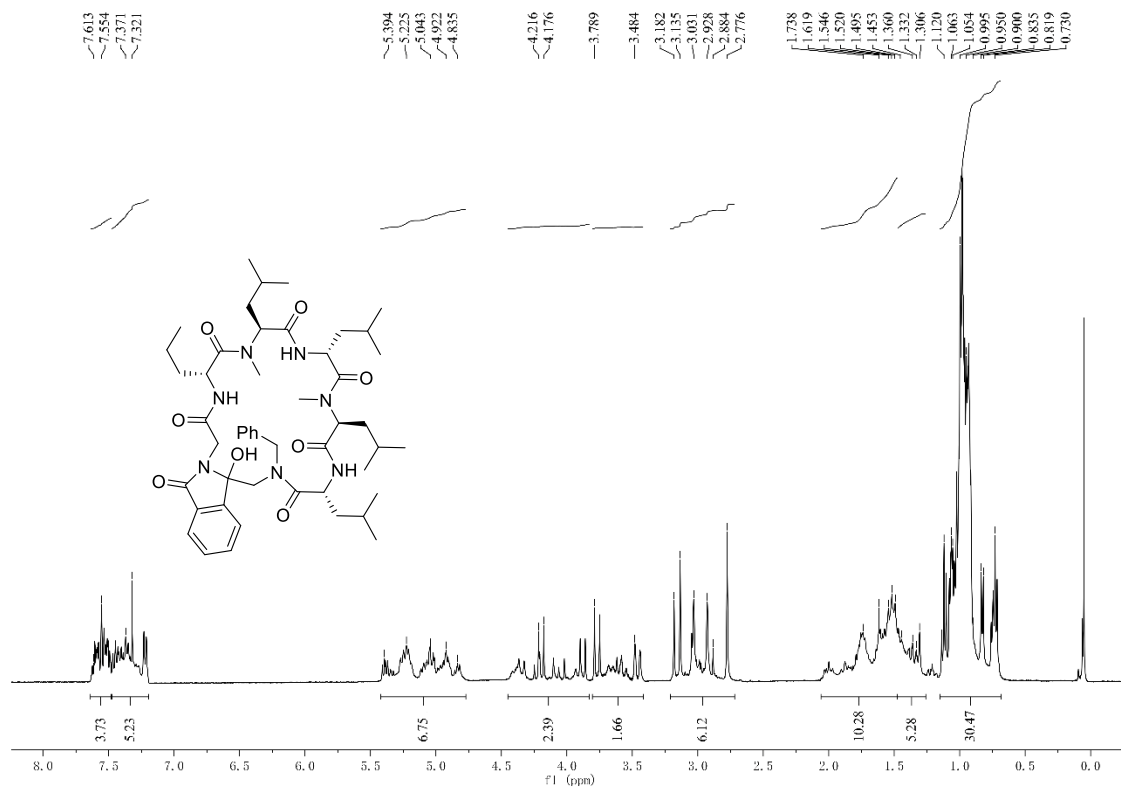

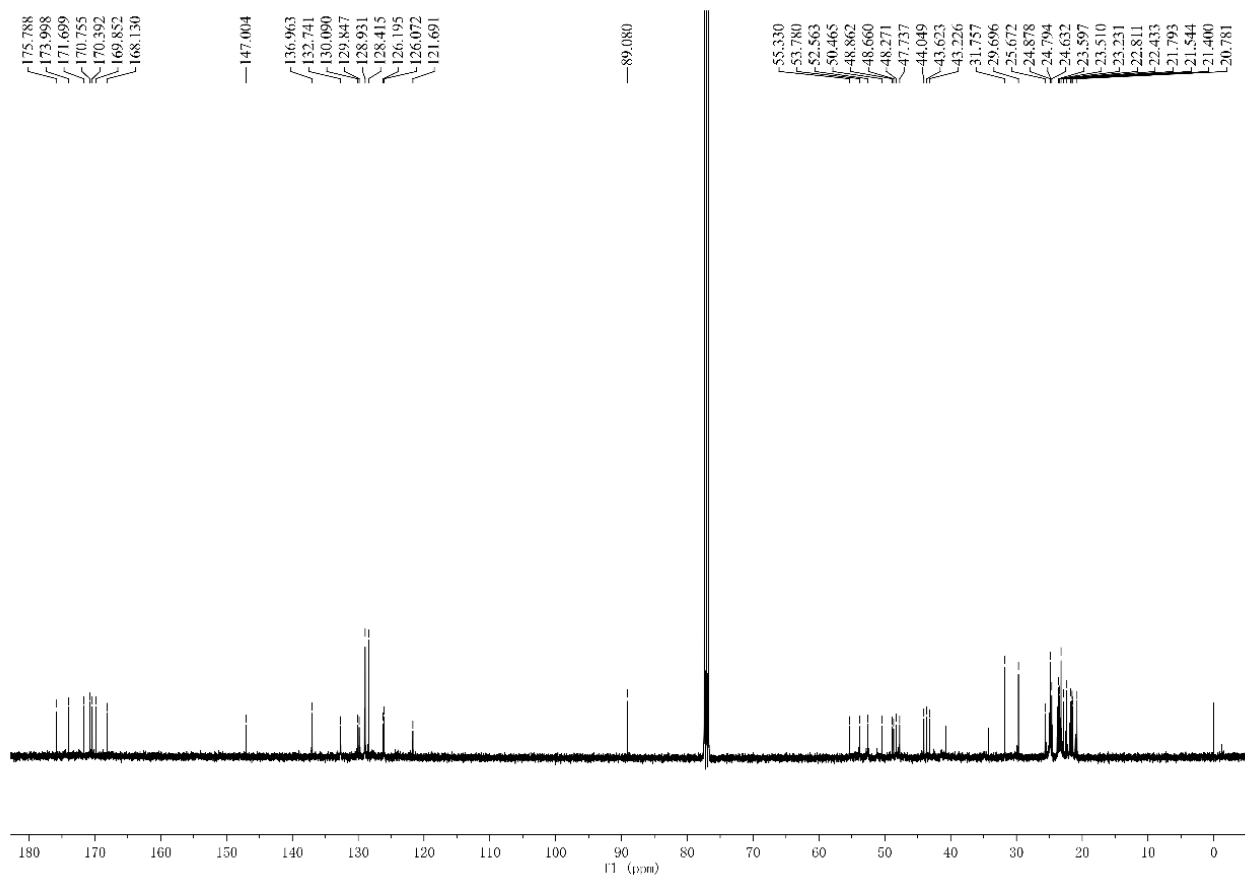

6-26 #14 RT: 0.10 AV: 1 NL: 5.02E7  
T: FTMS + p ESI Full lock ms [150.0000-2250.00]

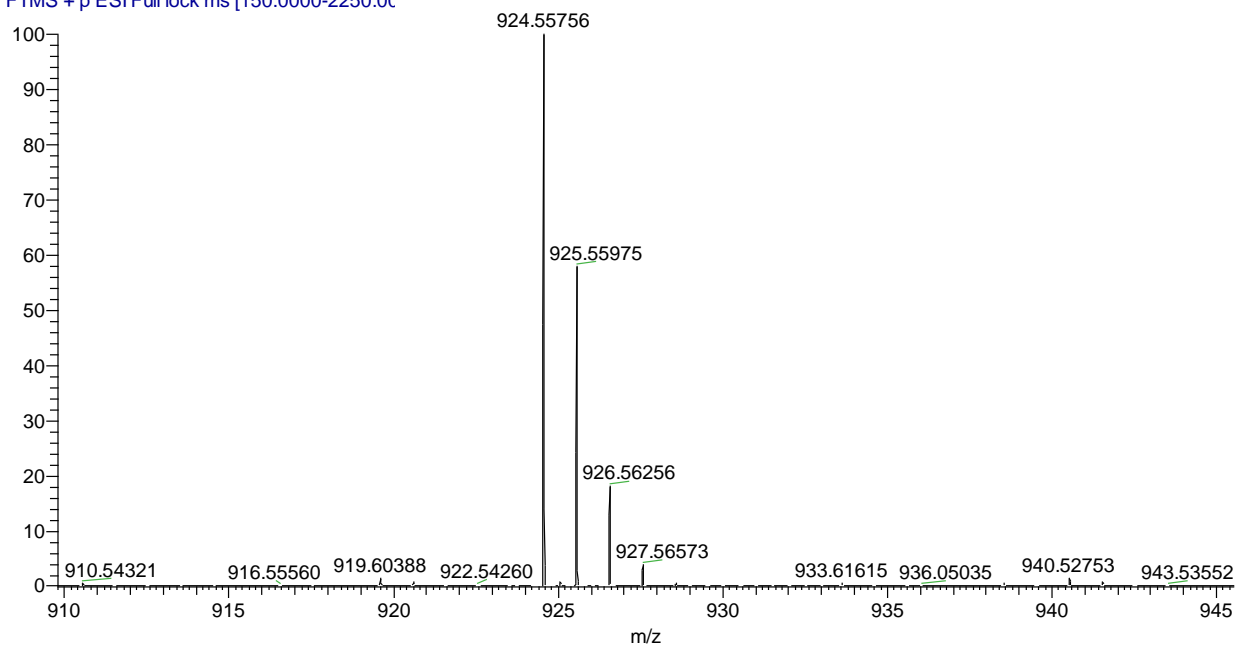

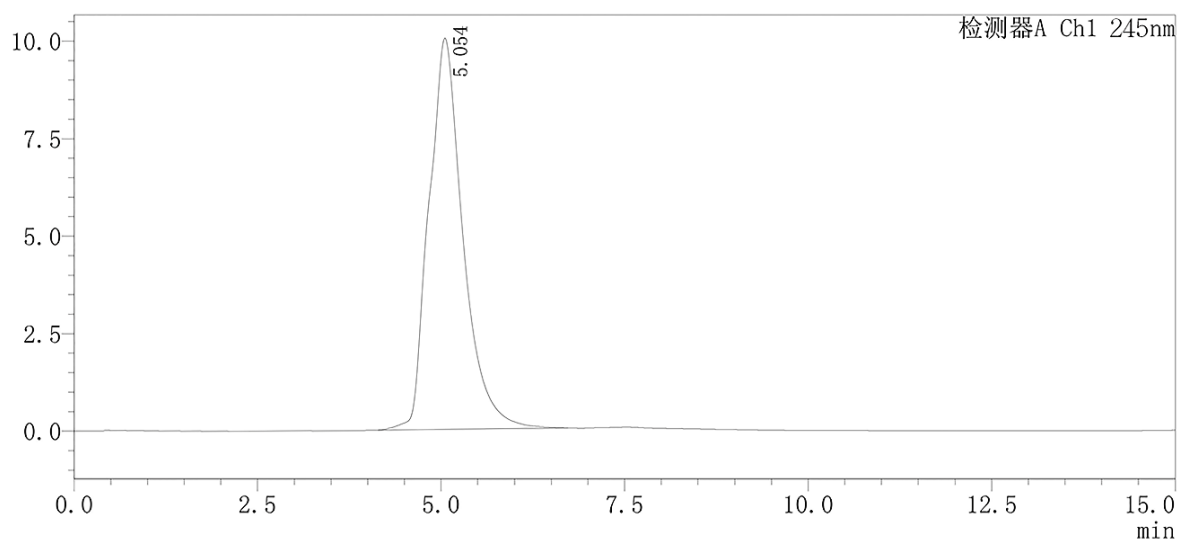

HPLC conditions: Shiseido Capcell PAK C18 (150×4.0 mm, 5 μm) was used as the column at 30 °C, and the mobile phase flow rate was 1 mL/min. During the analytical run, the elution was carried out using mobile phases A (Ultrapure water) and B (acetonitrile), the percentage of mobile phases B was 30%, while the detection wavelength was 245 nm.

(3)  $^1\text{H}$ ,  $^{13}\text{C}$ -NMR, HRMS and HPLC of **3**.

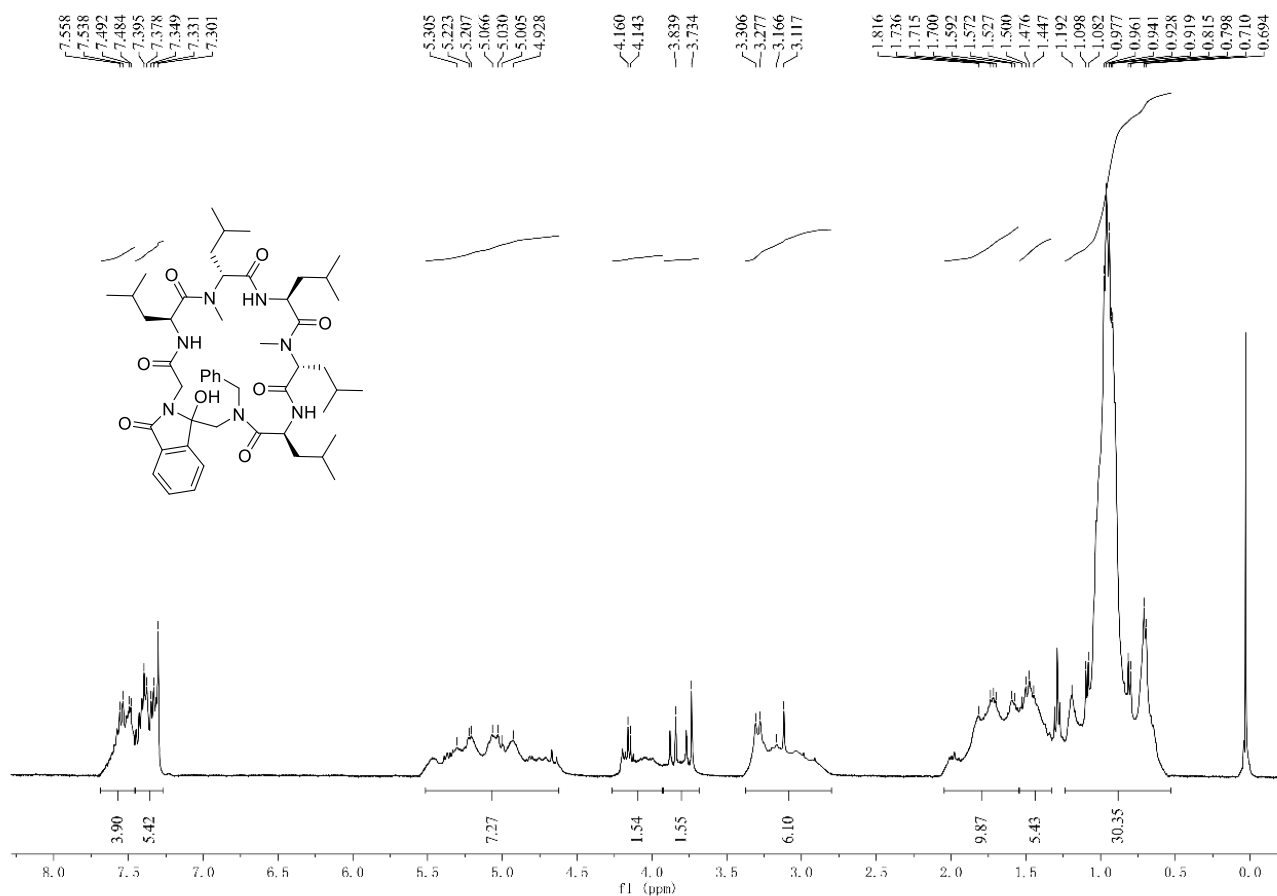

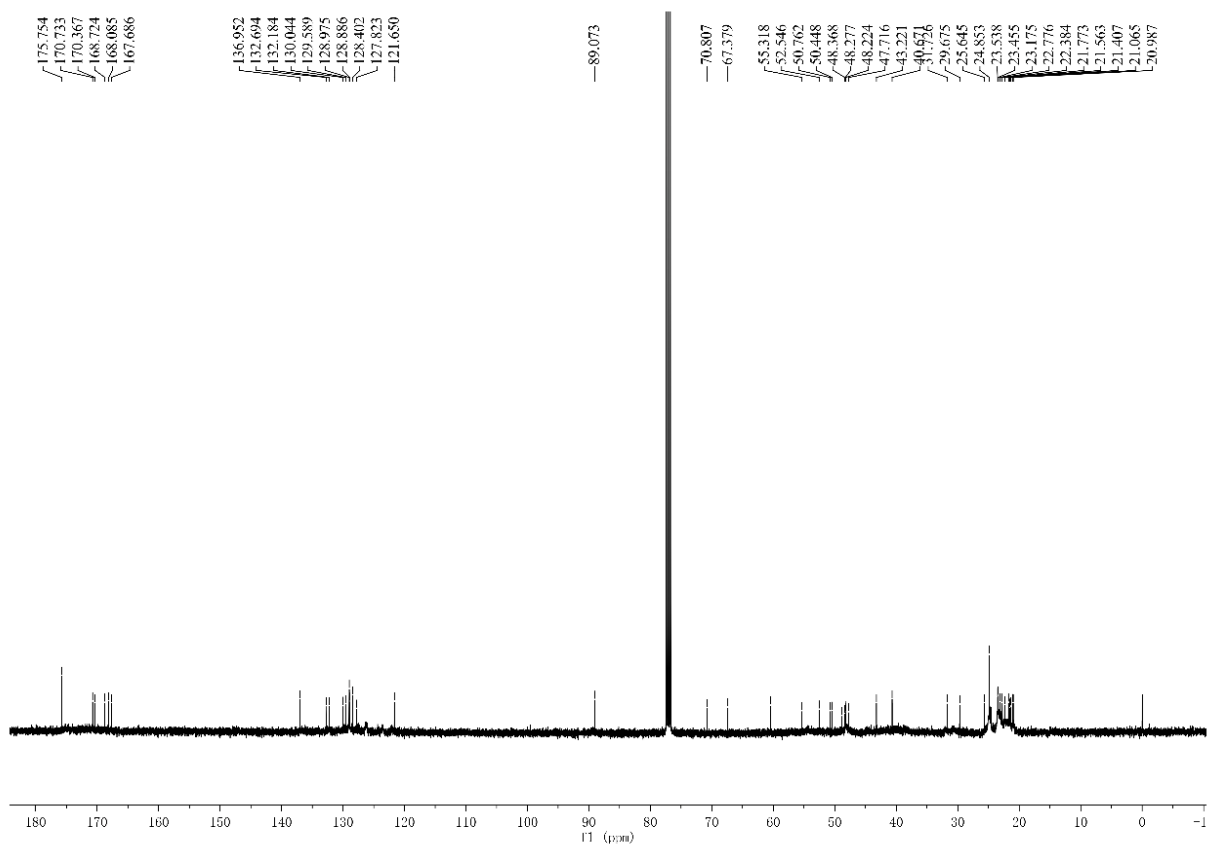

6-27 #15 RT: 0.11 AV: 1 NL: 9.91E7  
T: FTMS + p ESI Full lock ms [150.0000-2250.00]

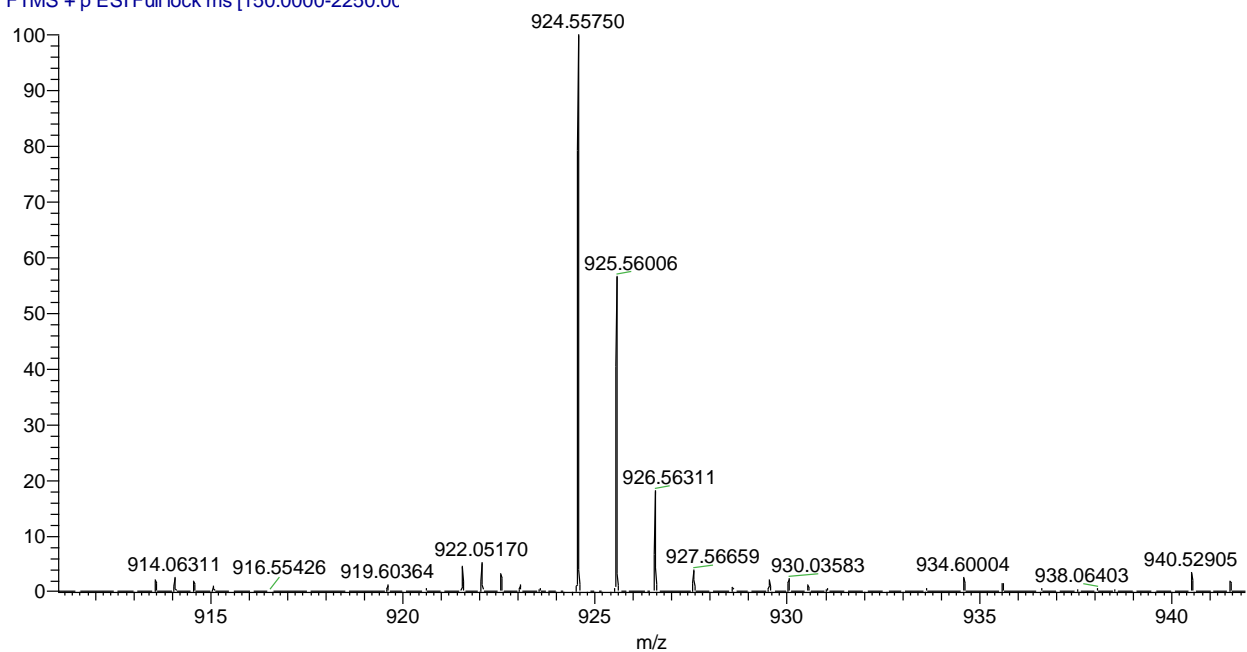

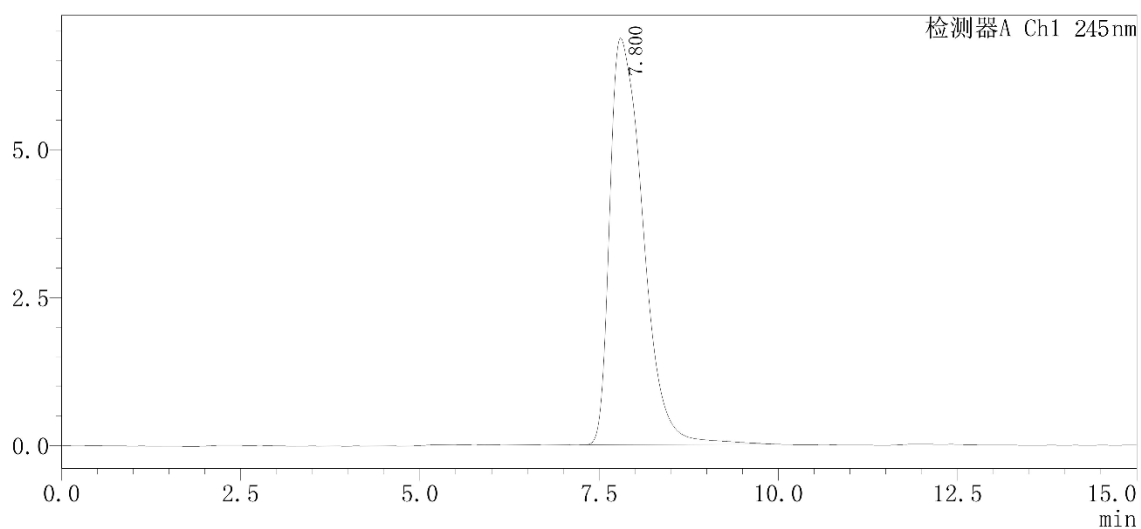

HPLC conditions: Shiseido Capcell PAK C18 (150×4.0 mm, 5 μm) was used as the column at 30 °C, and the mobile phase flow rate was 1 mL/min. During the analytical run, the elution was carried out using mobile phases A (Ultrapure water) and B (acetonitrile), the percentage of mobile phases B was 30%, while the detection wavelength was 245 nm.

(4)  $^1\text{H}$ ,  $^{13}\text{C}$ -NMR, HRMS and HPLC of **4**.

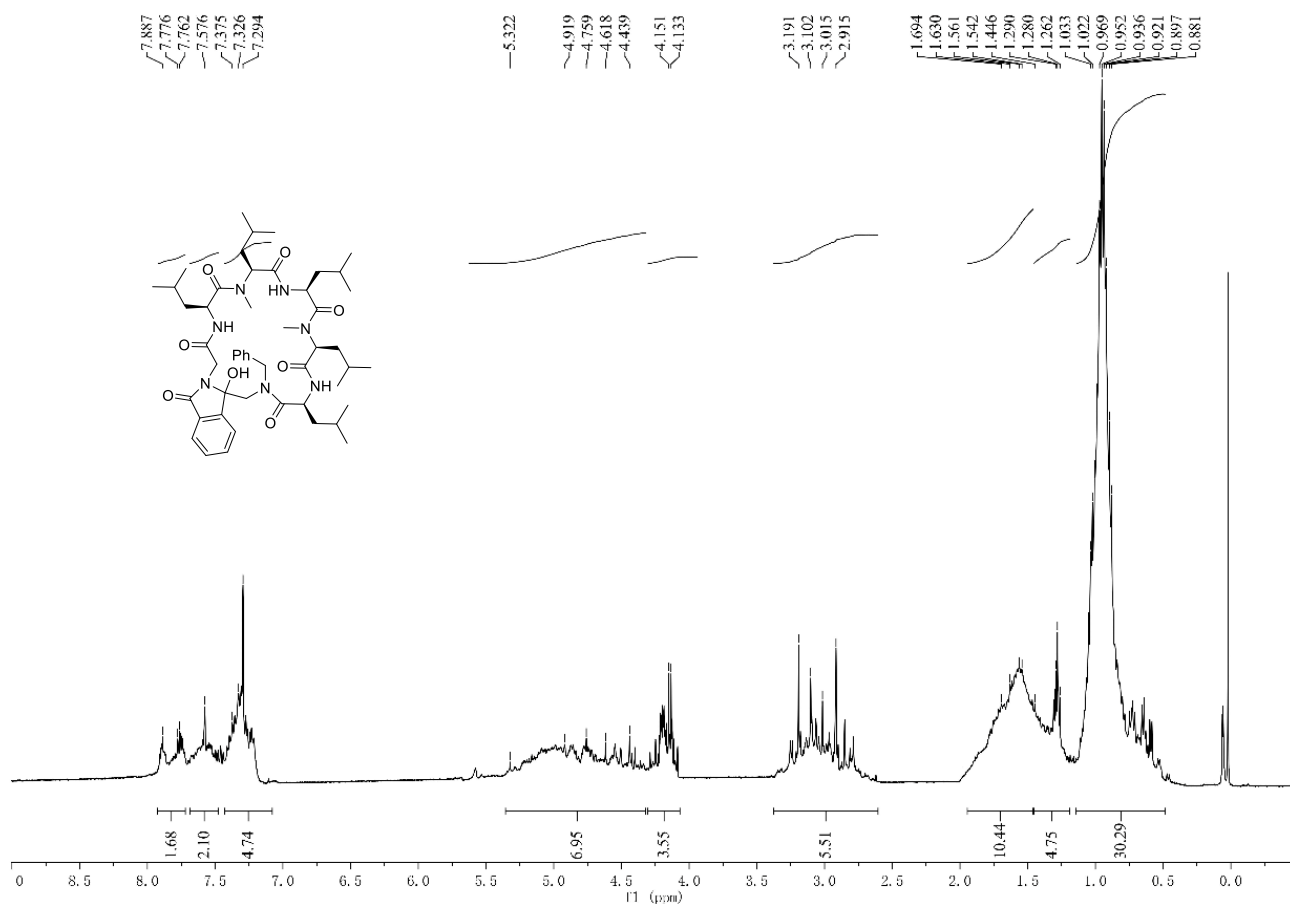

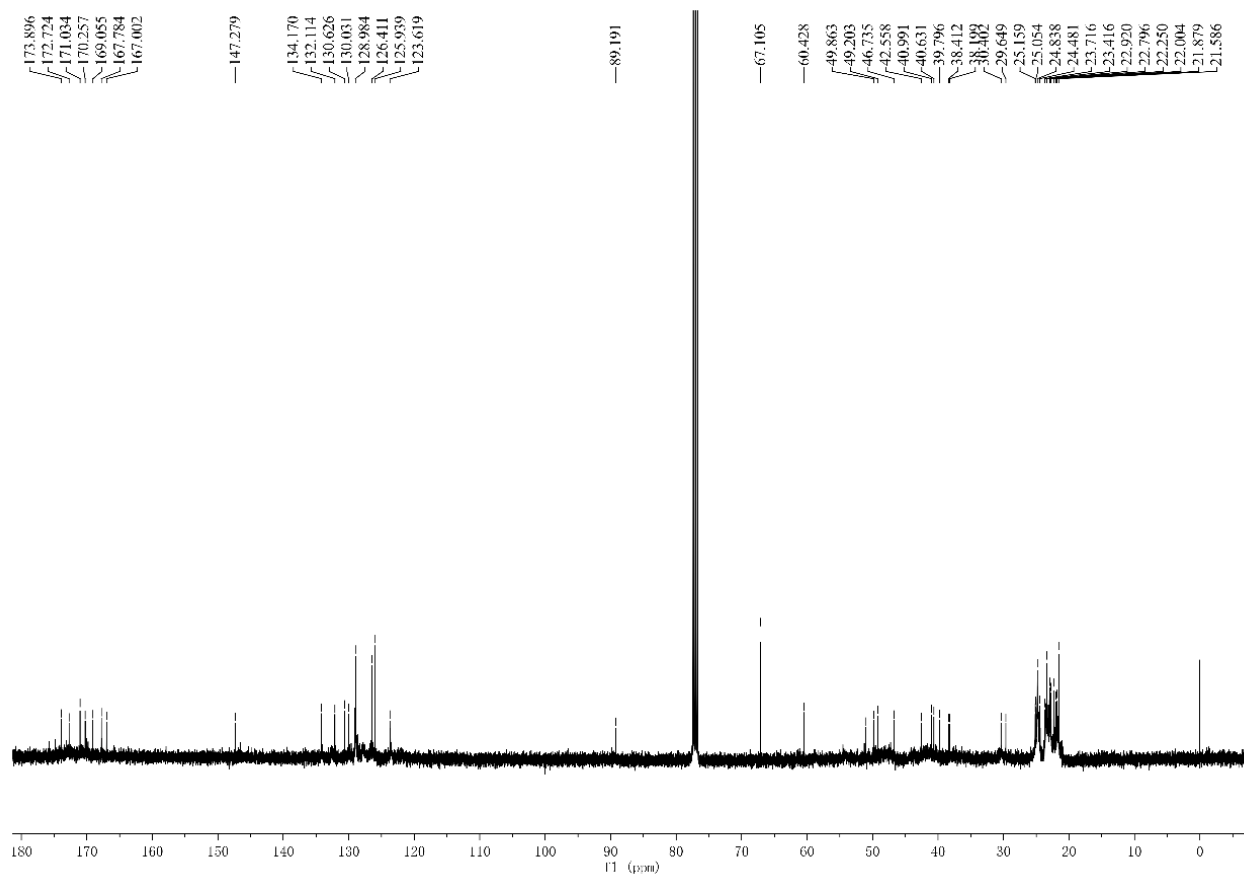

1-86 #9 RT: 0.10 AV: 1 NL: 1.16E7  
T: FTMS + p ESI Full lock ms [80.0000-1200.0000]

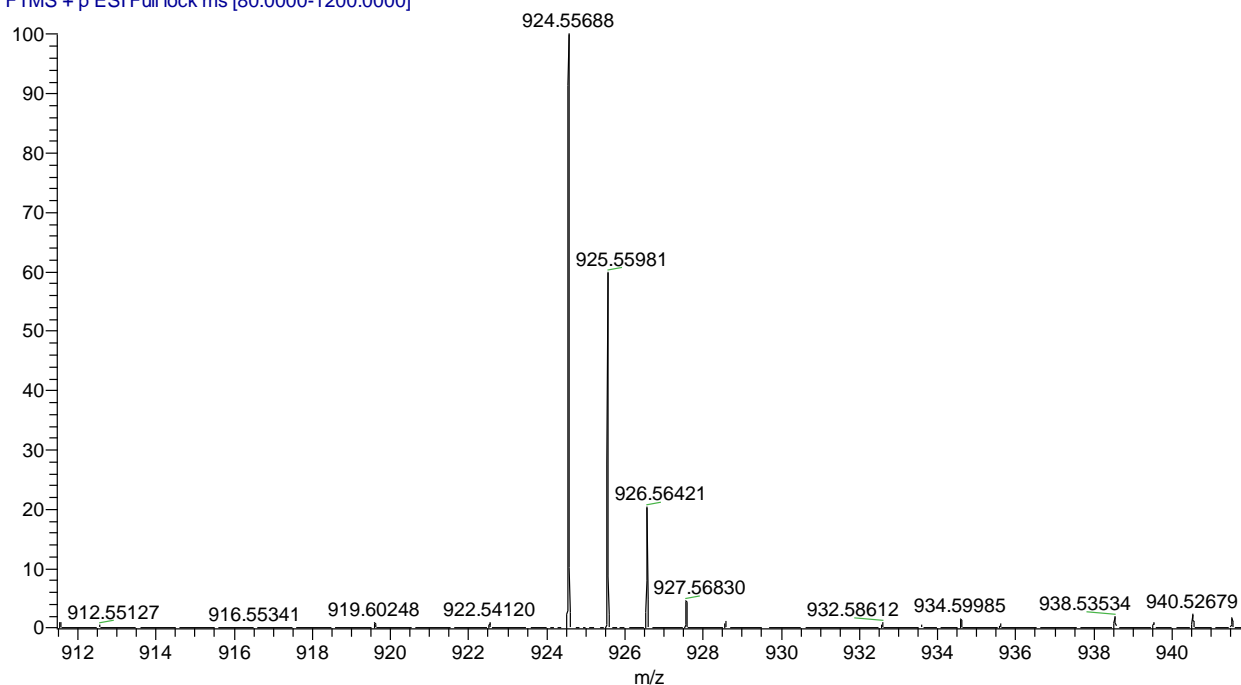

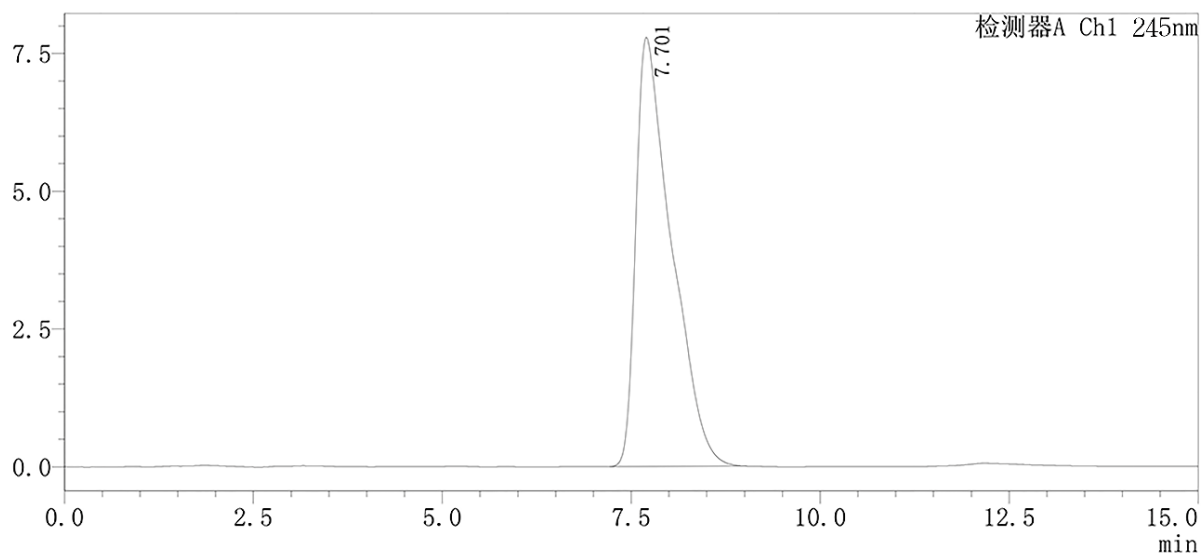

HPLC conditions: Shiseido Capcell PAK C18 (150×4.0 mm, 5 μm) was used as the column at 30 °C, and the mobile phase flow rate was 1 mL/min. During the analytical run, the elution was carried out using mobile phases A (Ultrapure water) and B (acetonitrile), the percentage of mobile phases B was 30%, while the detection wavelength was 245 nm.

(5)  $^1\text{H}$ ,  $^{13}\text{C}$ -NMR, HRMS and HPLC of **5**.

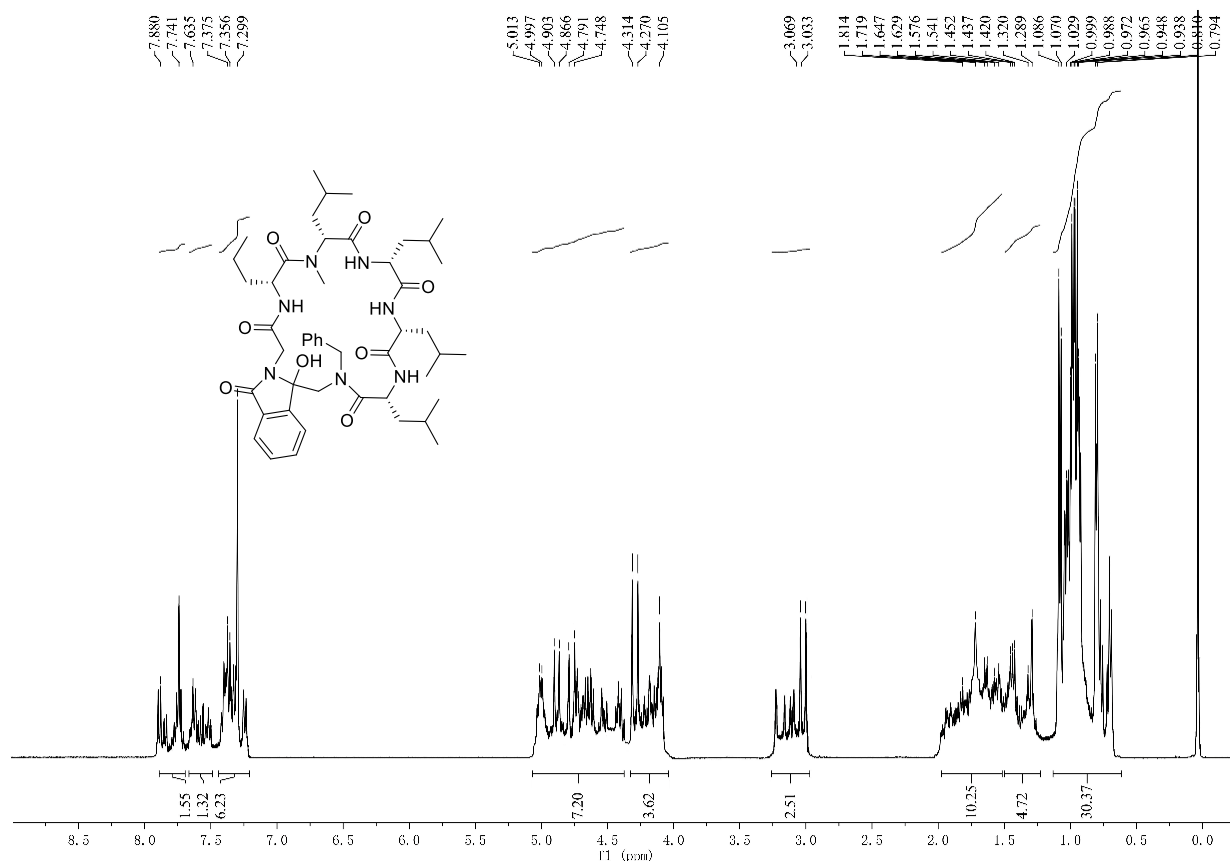



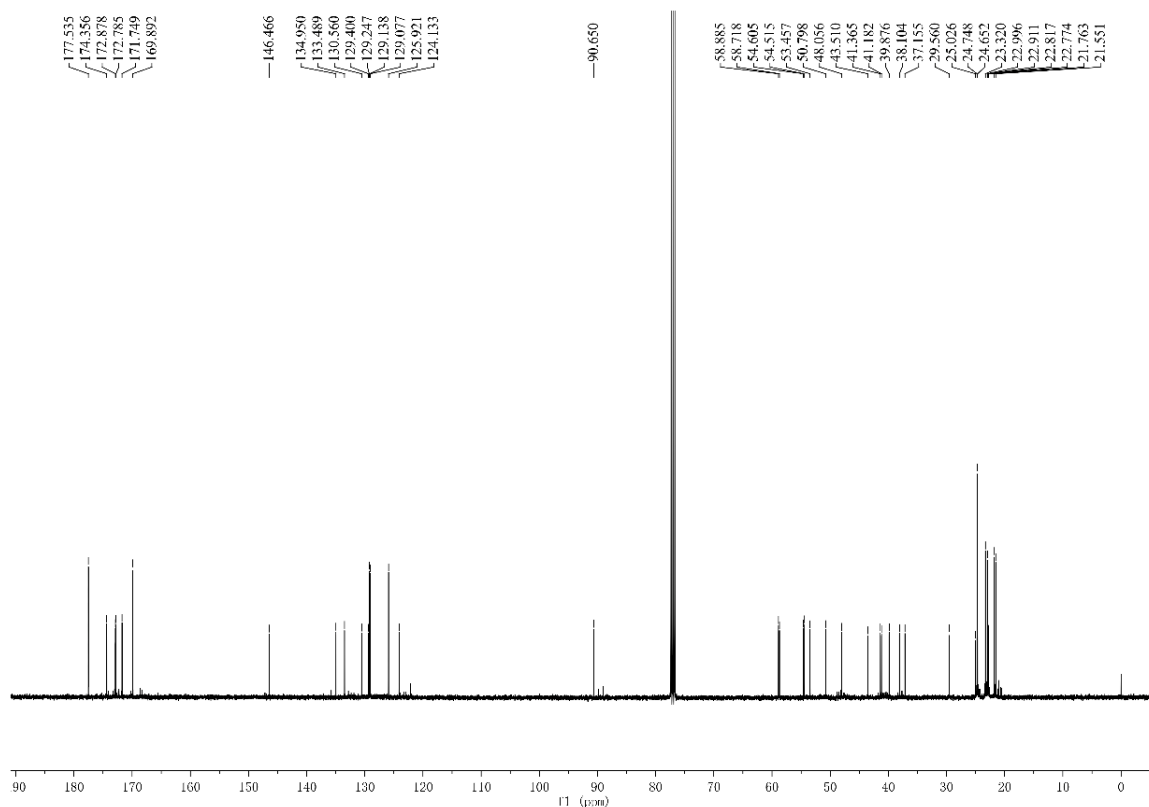

1-88 #9 RT: 0.10 AV: 1 NL: 2.98E7  
T: FTMS + p ESI Full lock ms [80.0000-1200.0000]

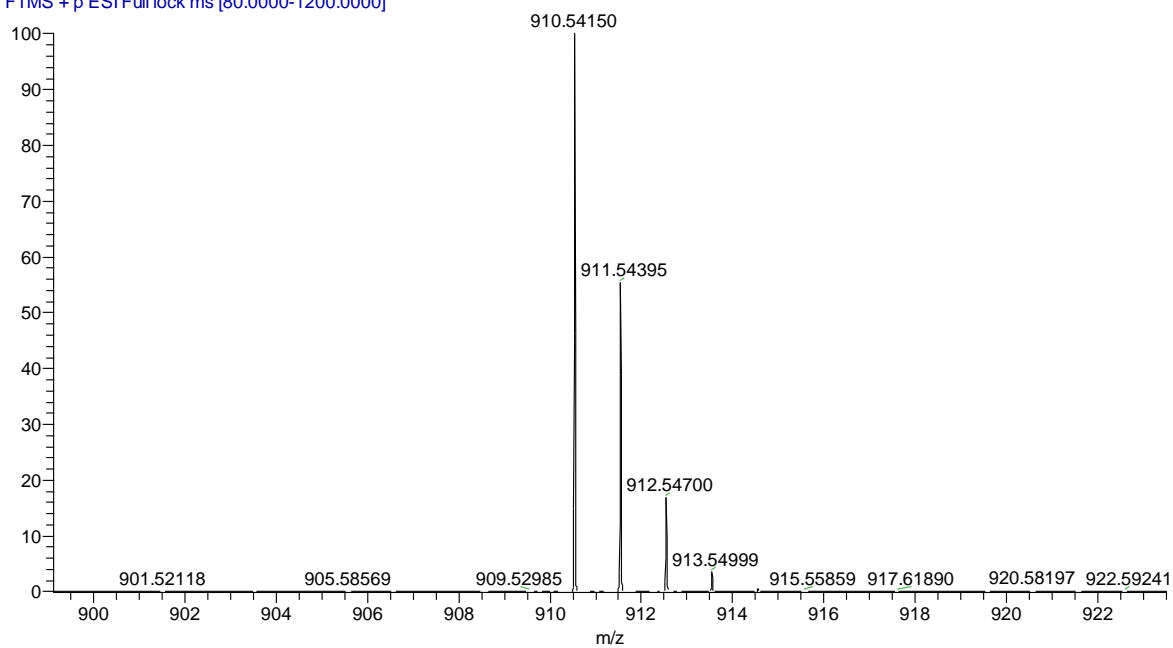

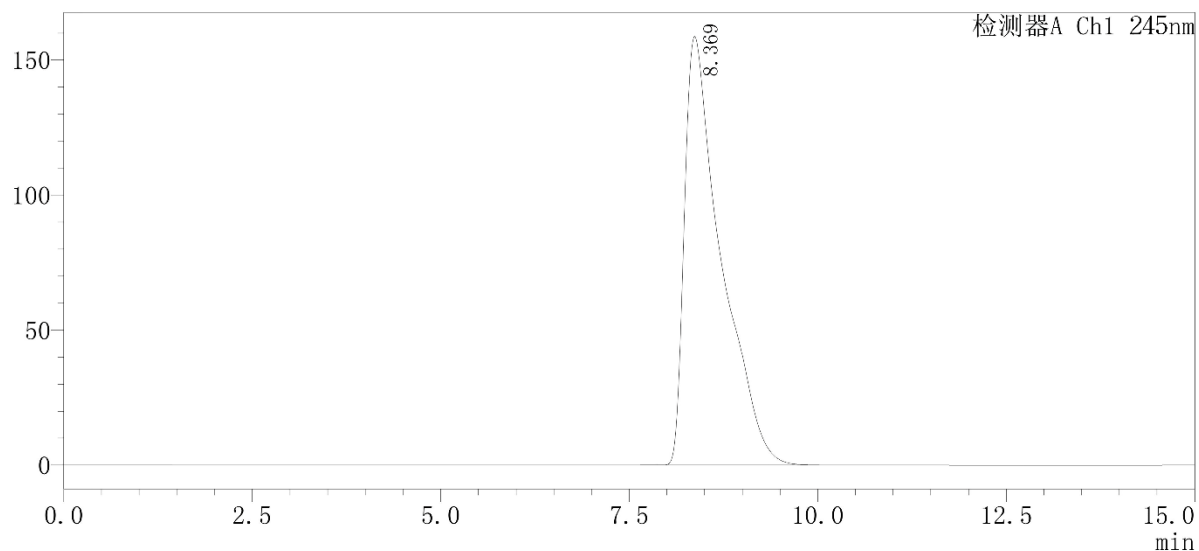

HPLC conditions: Shiseido Capcell PAK C18 (150×4.0 mm, 5 μm) was used as the column at 30 °C, and the mobile phase flow rate was 1 mL/min. During the analytical run, the elution was carried out using mobile phases A (Ultrapure water) and B (acetonitrile), the percentage of mobile phases B was 30%, while the detection wavelength was 245 nm.

(6)  $^1\text{H}$ ,  $^{13}\text{C}$ -NMR, HRMS and HPLC of **6**.

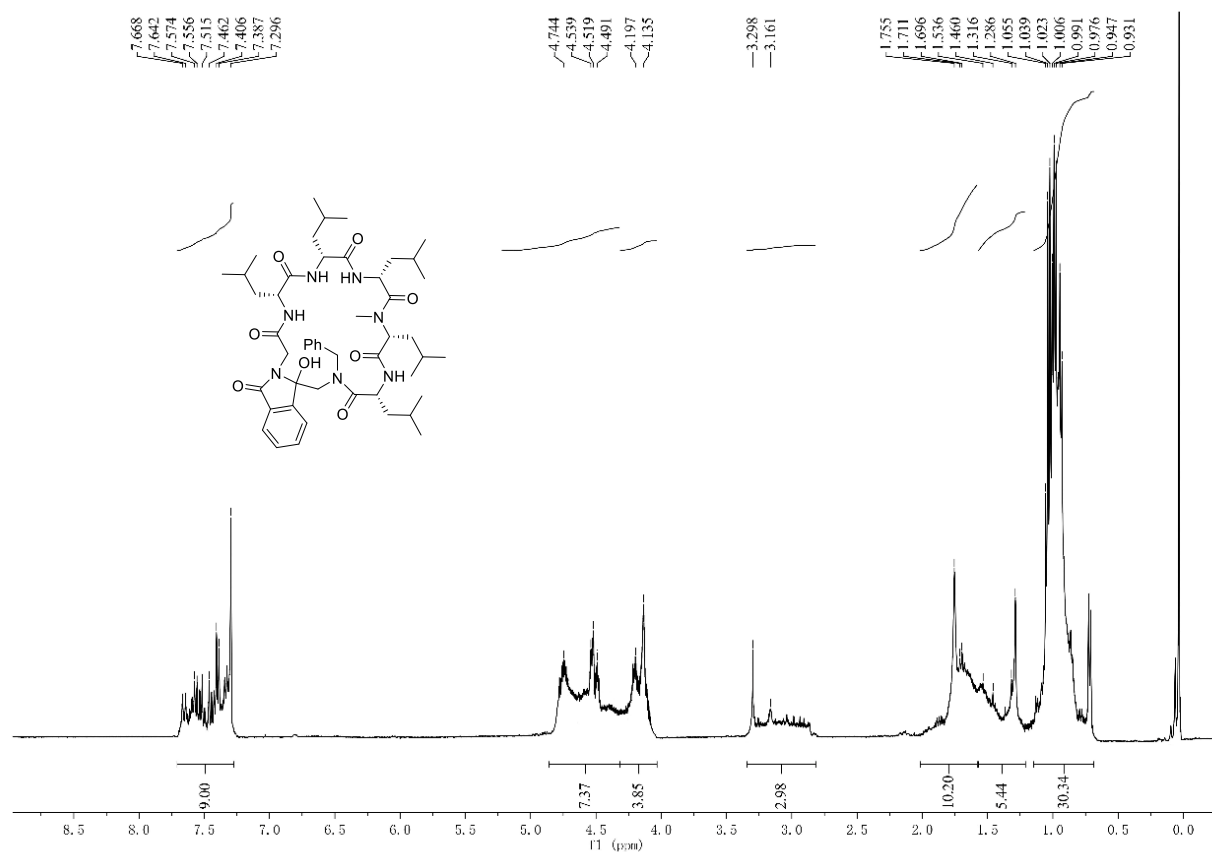

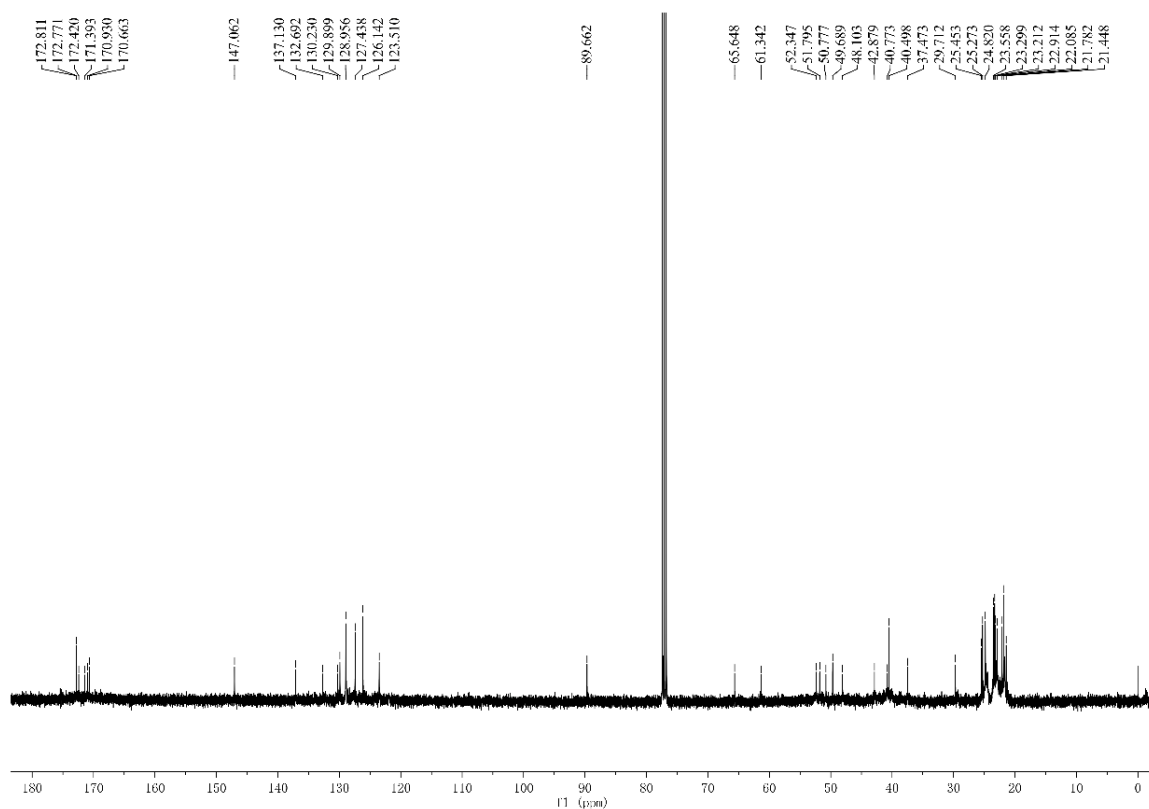

1-89 #9 RT: 0.10 AV: 1 NL: 2.61E6  
T: FTMS + p ESI Full lock ms [80.0000-1200.0000]

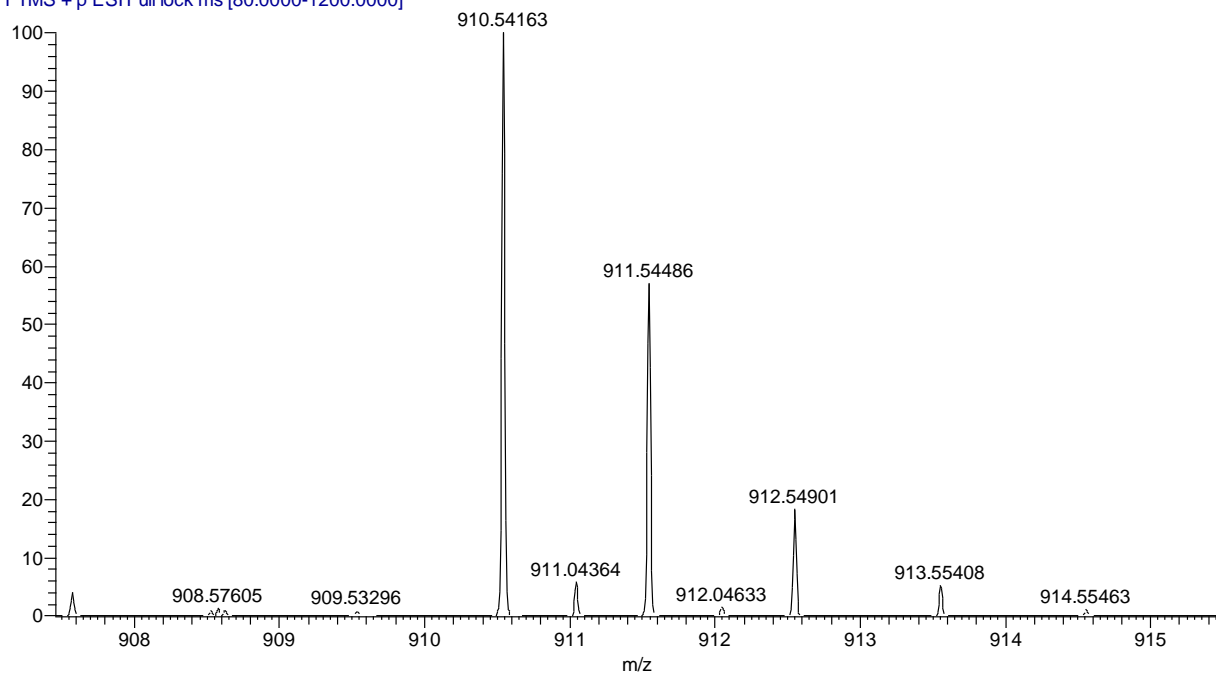



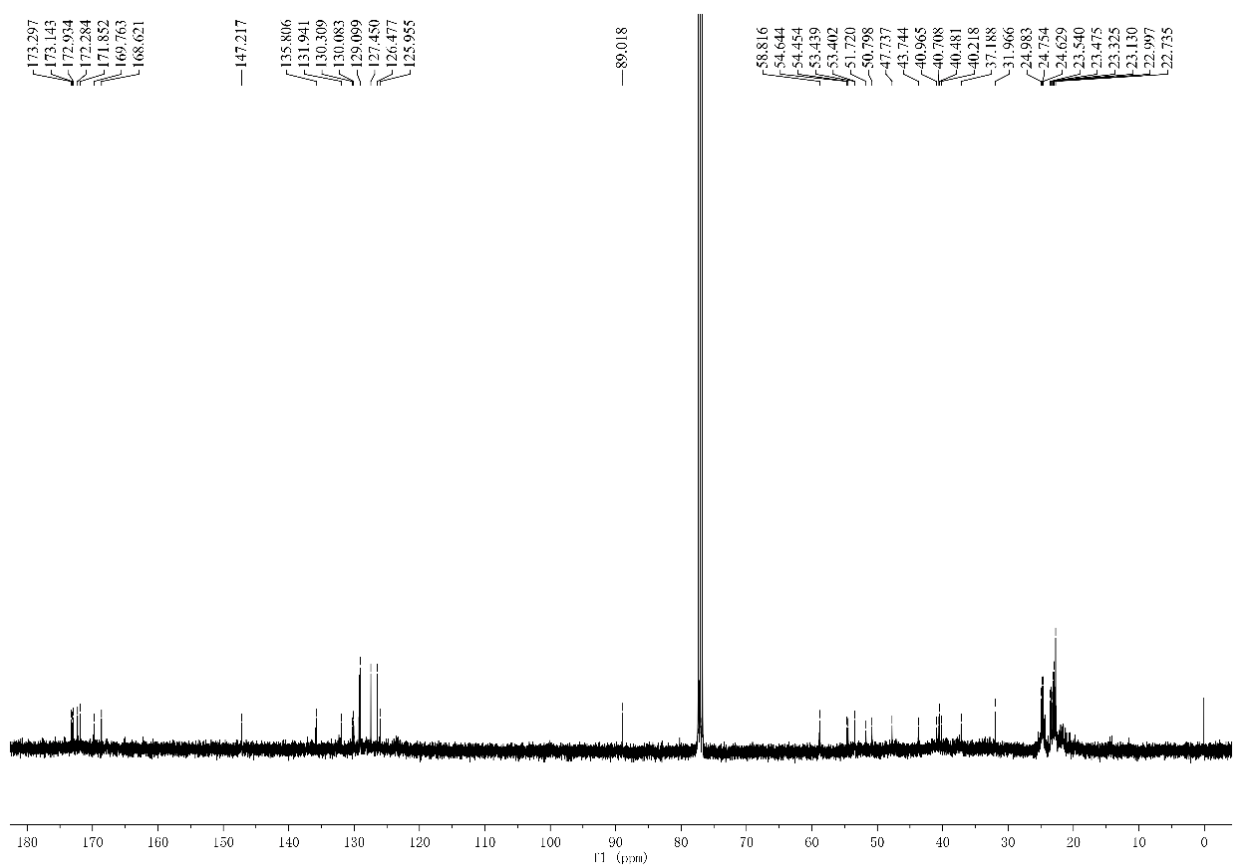

1-90 #9 RT: 0.10 AV: 1 NL: 8.93E6  
T: FTMS + p ESI Full lock ms [80.0000-1200.0000]

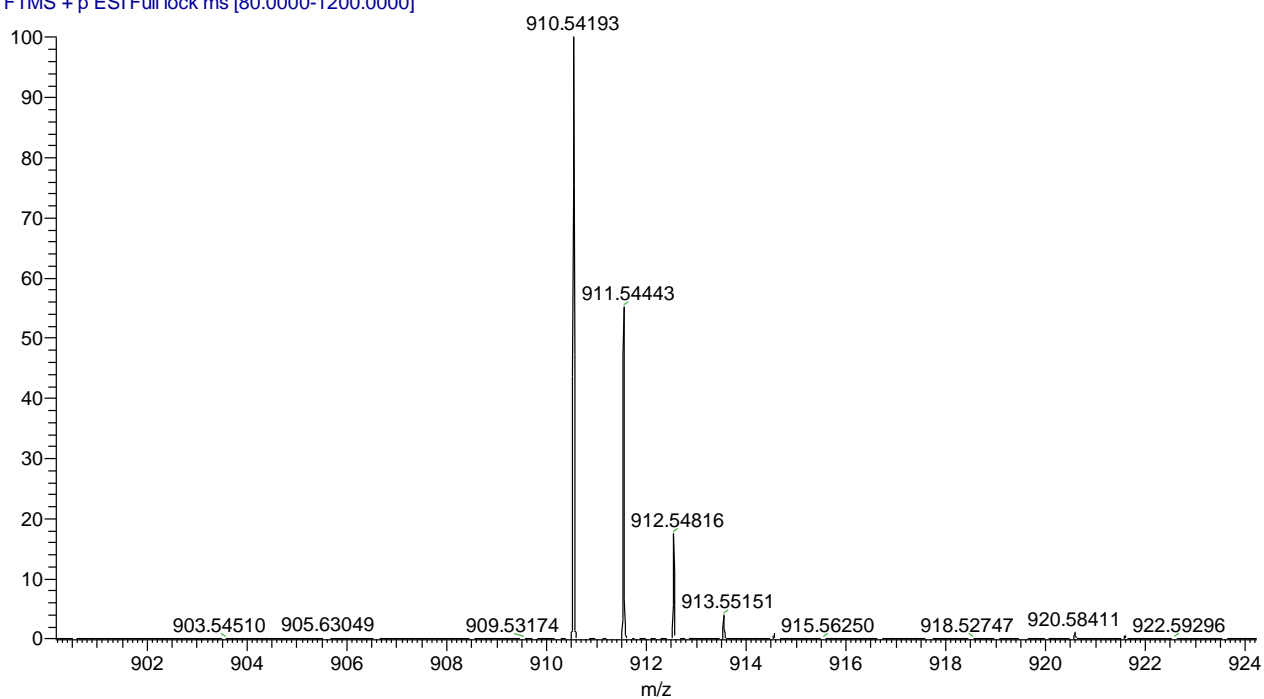

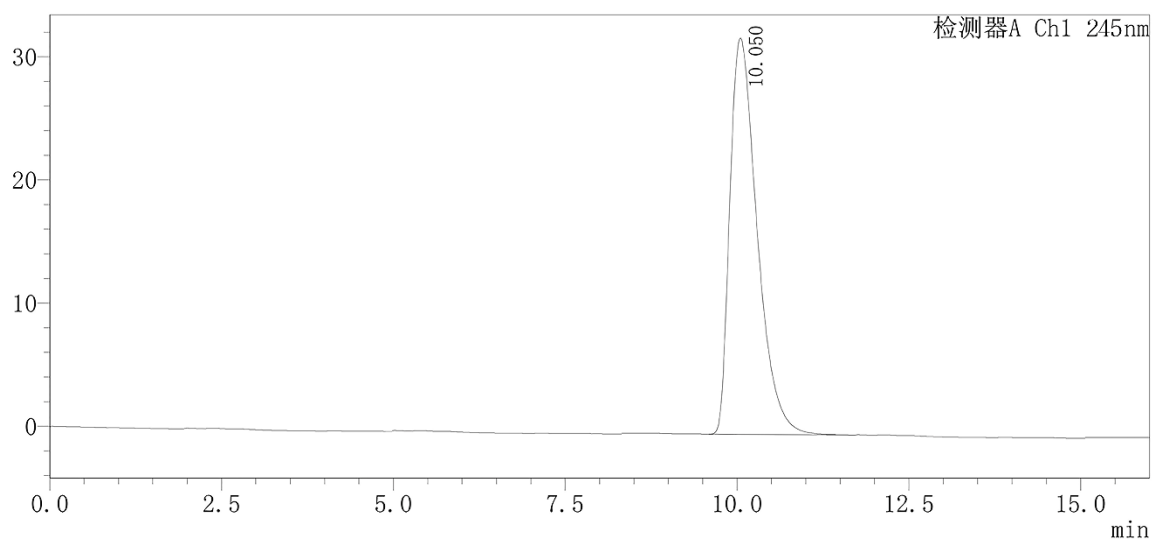

HPLC conditions: Shiseido Capcell PAK C18 (150×4.0 mm, 5 μm) was used as the column at 30 °C, and the mobile phase flow rate was 1 mL/min. During the analytical run, the elution was carried out using mobile phases A (Ultrapure water) and B (acetonitrile), the percentage of mobile phases B was 30%, while the detection wavelength was 245 nm.

(8)  $^1\text{H}$ ,  $^{13}\text{C}$ -NMR, HRMS and HPLC of **8**.

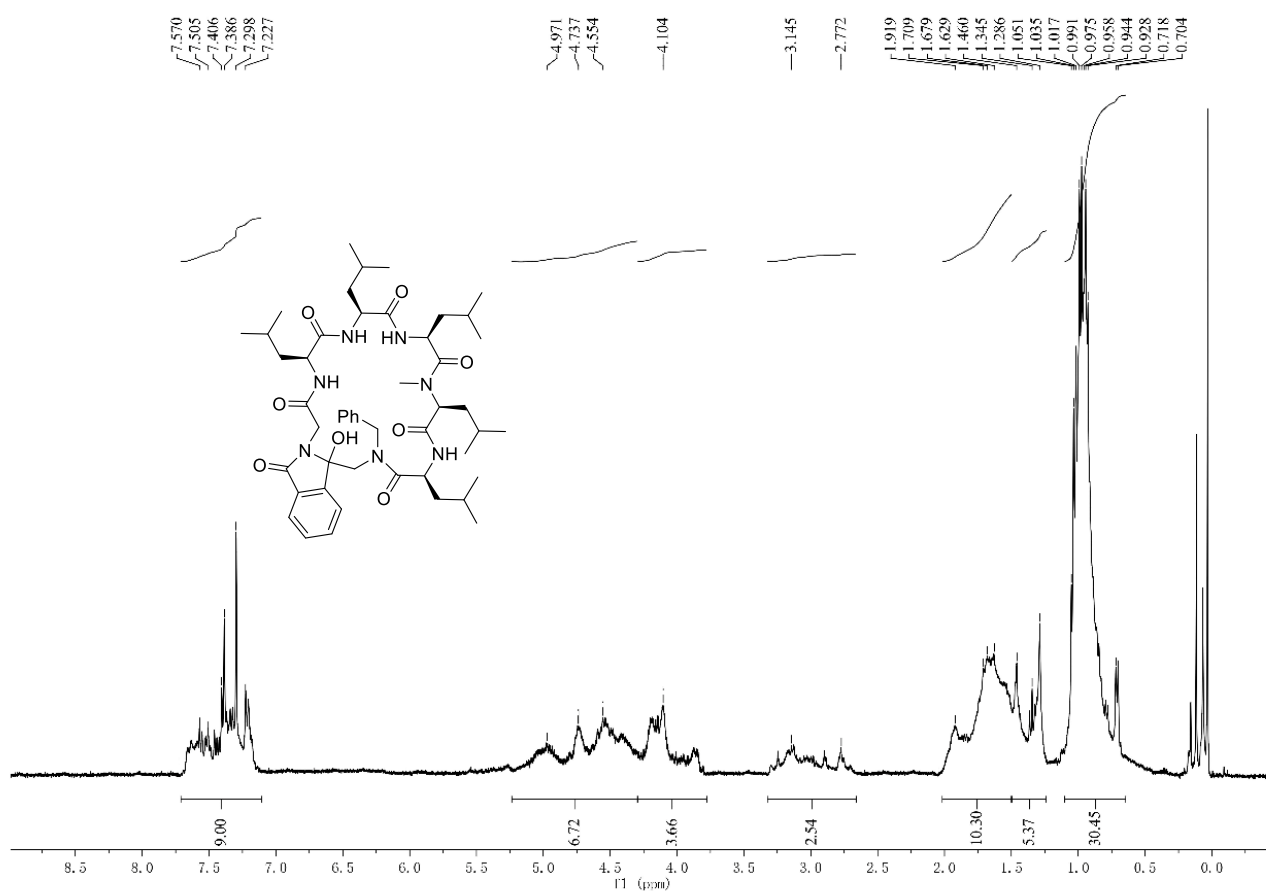

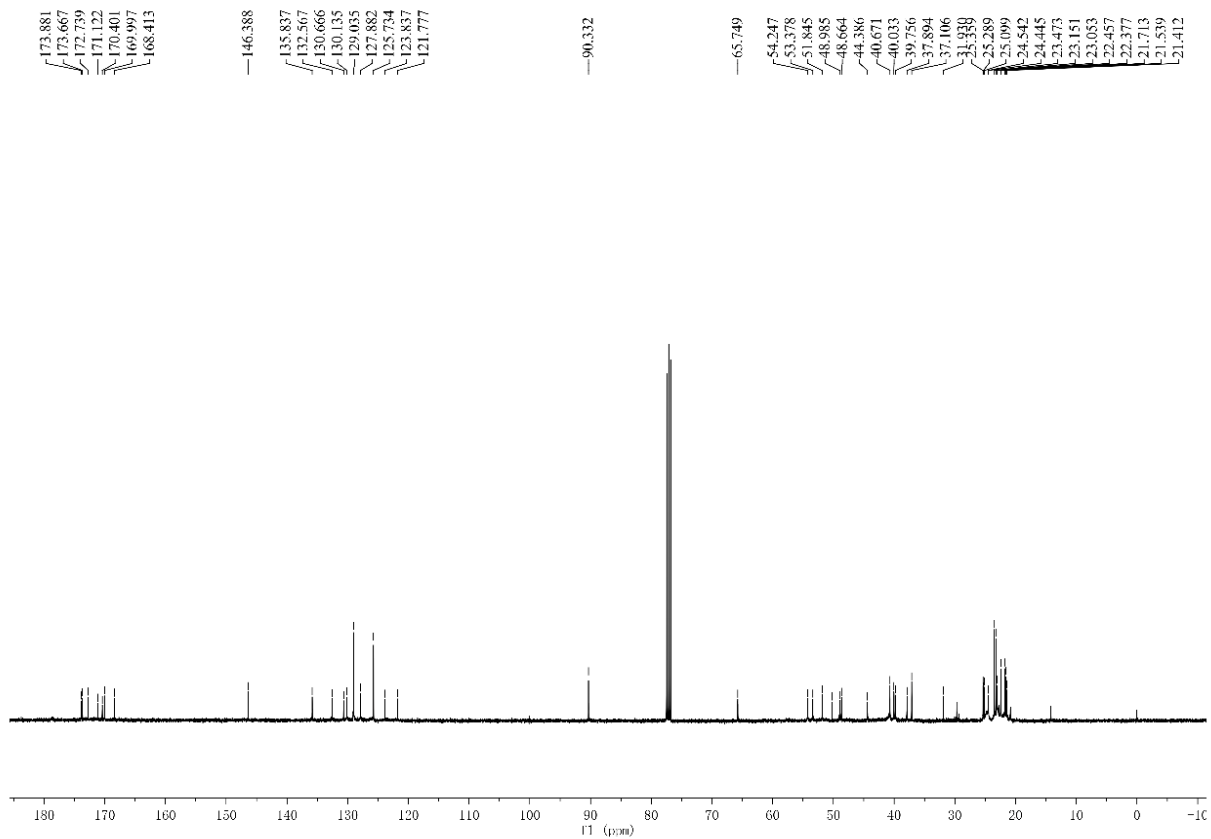

1-91 #9 RT: 0.10 AV: 1 NL: 1.36E7  
T: FTMS + p ESI Full lock ms [80.0000-1200.0000]

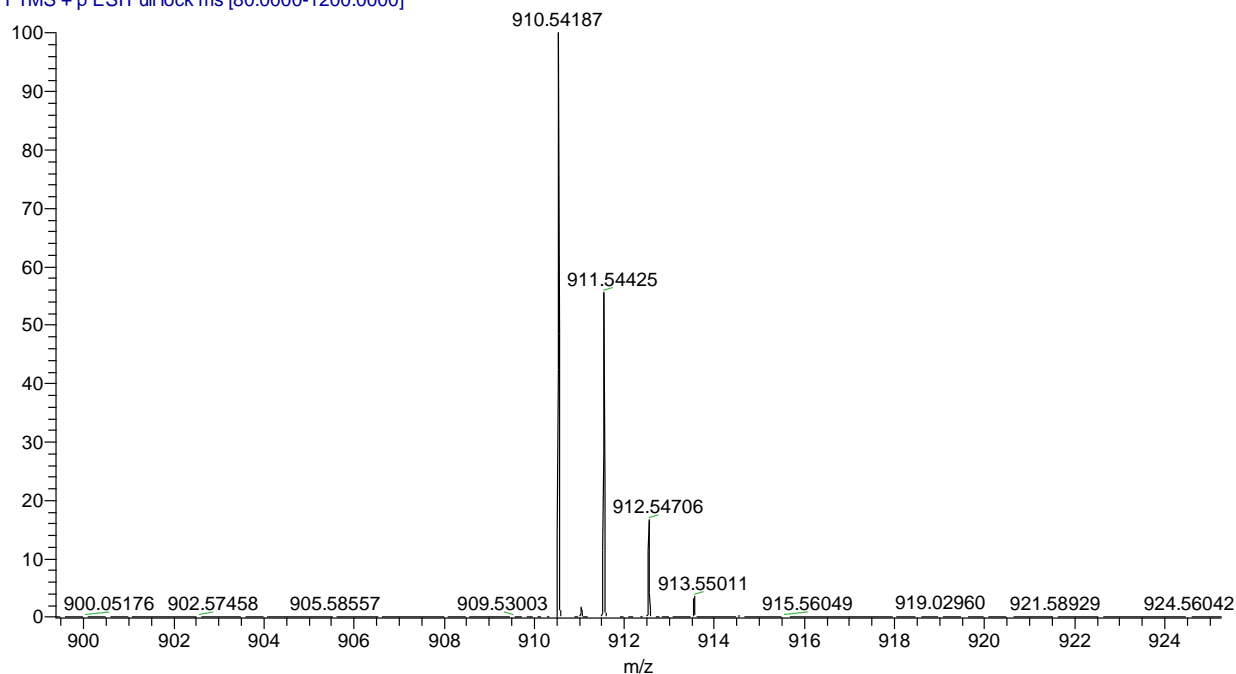

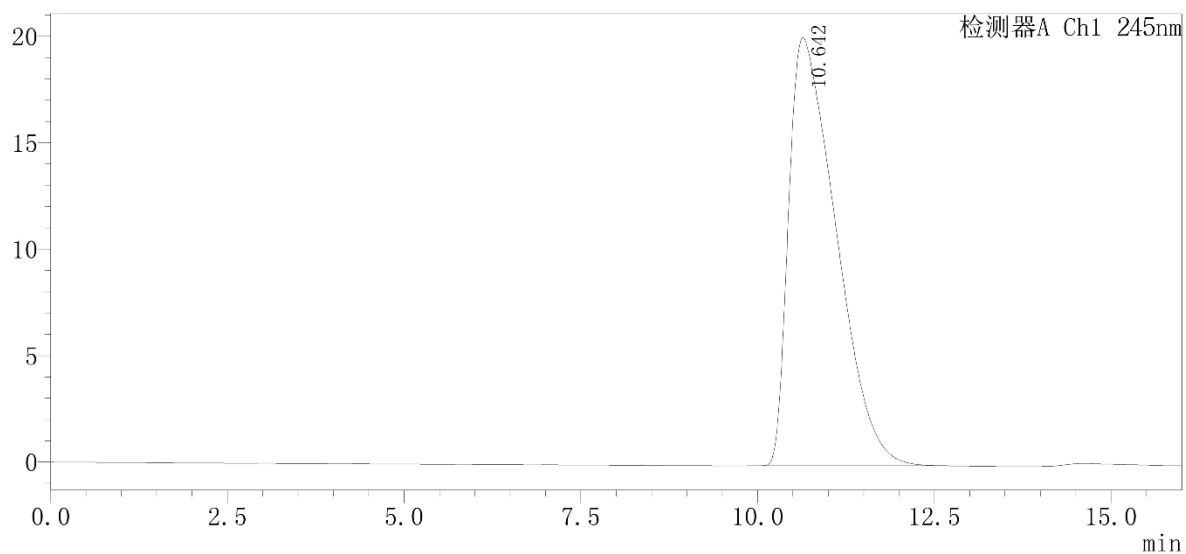

HPLC conditions: Shiseido Capcell PAK C18 (150×4.0 mm, 5 μm) was used as the column at 30 °C, and the mobile phase flow rate was 1 mL/min. During the analytical run, the elution was carried out using mobile phases A (Ultrapure water) and B (acetonitrile), the percentage of mobile phases B was 30%, while the detection wavelength was 245 nm.
